# Supplementary material for: Mitochondrial stress response gene Clpp deficiency impairs oocyte competence and deteriorate cyclophosphamide-induced ovarian damage in young mice
Source: Front Endocrinol (Lausanne). 2023 Mar 24;14:1122012. doi: 10.3389/fendo.2023.1122012 (PMC10081448; doi:10.3389/fendo.2023.1122012)
Supplement: Supplementary file 2 [file Table_1.xlsx]

## Sheet: Fig 1-Cii 
Fig 1-Cii Western blot to measure clpp knockout efficacy
		Area	Mean	IntDen	RawIntDen		clpp/actin
Clpp	WT-1	0.72	150.73	108.08	38910395		0.695809	0.698648	0.995936
	CKO-1	0.35	26.75	9.45	3403182		0.0825039		0.118091
	WT-2	0.76	108.49	82.28	29619749		0.794362		1.137
	CKO-2	0.38	44.68	16.83	6059547		0.229949		0.329135
	WT-3	0.98	103.39	101.14	36410995		0.605774		0.867066
	CKO-3	0.6	50.61	30.55	10996750		0.18628		0.26663
Actin	WT-1	0.8	194.73	155.33	55919969
	CKO-1	0.79	145.44	114.54	41235621
	WT-2	0.73	142	103.58	37289608
	CKO-2	0.61	120.65	73.19	26349205
	WT-3	0.9	186.22	166.96	60105414
	CKO-3	0.92	178.26	164	59038434
								WT	CKO
								0.995936	0.118091
								1.137	0.329135
								0.867066	0.26663
								WT	CKO
							AVG	1	0.237952
							SEM	0.0636454	0.0511028

## Sheet: Fig 1-G 
Fig 1-G qPCR to measure clpp knockout efficacy
Sample Name	Target Name	Cт
WT-MII-1	actin	30.9393
WT-MII-1	actin	30.201
WT-MII-1	actin	30.0672
WT-MII-2	actin	30.232			WT-MII-1	WT-MII-2	WT-MII-3	CKO-MII-1	CKO-MII-2	CKO-MII-3
WT-MII-2	actin	30.4775		actin	30.9393	30.232	30.9486	31.693	32.0828	32.6538
WT-MII-2	actin	30.3098		actin	30.201	30.4775	30.2166	32.6774	31.7565	31.653
WT-MII-3	actin	30.9486		actin	30.0672	30.3098	30.5058	31.6918	32.5848	31.8089
WT-MII-3	actin	30.2166		CLPP	33.8531	33.0368	34.1291	36.8153	37.1188	37.14
WT-MII-3	actin	30.5058		CLPP	33.3067	33.4433	33.8557	37.693	37.4941	36.9622
CKO-MII-1	actin	31.693		CLPP	33.2403	33.7161	33.6325	37.3582	36.9975	37.1128
CKO-MII-1	actin	32.6774
CKO-MII-1	actin	31.6918
CKO-MII-2	actin	32.0828
CKO-MII-2	actin	31.7565			WT-MII-1	WT-MII-2	WT-MII-3	CKO-MII-1	CKO-MII-2	CKO-MII-3
CKO-MII-2	actin	32.5848		gapdh	30.4025	30.3398	30.557	32.0207	32.1414	32.0385
CKO-MII-3	actin	32.6538
CKO-MII-3	actin	31.653
CKO-MII-3	actin	31.8089
WT-MII-1	CLPP	33.8531		CLPP	33.4667	33.3987	33.8724	37.2888	37.2035	37.0717
WT-MII-1	CLPP	33.3067			3.06418	3.05898	3.31547	5.26811	5.06211	5.03312
WT-MII-1	CLPP	33.2403			3.14621
WT-MII-2	CLPP	33.0368			-0.0820329	-0.0872279	0.169261	2.12189	1.9159	1.88691
WT-MII-2	CLPP	33.4433			1.05851	1.06233	0.889298	0.229745	0.265006	0.270386
WT-MII-2	CLPP	33.7161			1.00338
WT-MII-3	CLPP	34.1291			1.05495	1.05875	0.886304	0.228972	0.264114	0.269475
WT-MII-3	CLPP	33.8557
WT-MII-3	CLPP	33.6325
CKO-MII-1	CLPP	36.8153				WT-MII		CKO-MII
CKO-MII-1	CLPP	37.693			AVG	1		0.254187
CKO-MII-1	CLPP	37.3582			SEM	0.0464247		0.0103714
CKO-MII-2	CLPP	37.1188
CKO-MII-2	CLPP	37.4941
CKO-MII-2	CLPP	36.9975
CKO-MII-3	CLPP	37.14
CKO-MII-3	CLPP	36.9622
CKO-MII-3	CLPP	37.1128

## Sheet: fig 1-H,I
Fig 1-H, I fertility testing																						Clppfl/fl		Clppfl/fl;ZP3-Cre
												birthday(day)		mating day	Clppfl/fl	Clppfl/fl;ZP3-Cre						(0331) 5pups	5	(0404)15pups	15
	cko-1	(0419) 6pups (0425)5pups (0519)6pups (0617)4pups (0725)7pups (0821)6pups (0911)6pups (1007) 4pups (1113)1pups									2.03333	61	2022-03-04	DAY 1	0	0	1	0	0			(0404) 7pups	7	(0405) 7pups	7
	cko-2	(0404)15pups (0423)8pups (0728)8pups (0917) 2pups(1117)3 pups									2.06667	62	2022-03-05	DAY 2	0	0	1	0	0			(0407) 7pups	7	(0407) 10pups	10
	cko-3	(0419) 1pups (0519)2pups (0619)2pups (0803)4pups (0925) 3pups (1022) 2 pups (1116)2pups									2.1	63	2022-03-06	DAY 3	0	0	1	0	0			(0410)9pups	9	(0419) 1pups	1
	cko-4	(0405) 7pups (0430)1pups dead (0612)7pups (0708)6pups (0820)2pups(0924)4pups(1020)3pups									2.13333	64	2022-03-07	DAY 4	0	0	1	0	0			(0413)8pups	8	(0419) 6pups	6
	cko-5	(0601)7pups (0626)2pups (0714)6pups (0809)3pups(0830)7pups (0930)2pups(1021)4pups									2.16667	65	2022-03-08	DAY 5	0	0	1	0	0			(0429) 3 pups	3	(0423)8pups	8
	cko-6	(0407) 10pups (0516)5pups (0613)4pups (0807)5pups(0902)8pups(0924)4pups									2.2	66	2022-03-09	DAY 6	0	0	1	0	0			(0507)10pups	10	(0425)5pups	5
											2.23333	67	2022-03-10	DAY 7	0	0	1	0	0			(0511)11pups	11	(0430)1pups	1
											2.26667	68	2022-03-11	DAY 8	0	0	1	0	0			(0512)9pups	9	(0516)5pups	5
	WT-1	(0507)10pups (0529)13pups (0620)7pups (0714)3pups (0826)11pups (1106)4pups									2.3	69	2022-03-12	DAY 9	0	0	1	0	0			(0513)7pups	7	(0519)2pups	2
	WT-2	(0410)9pups (0512)9pups(0717)9pups (0809)8pups(0916)9pups (1128)6pups									2.33333	70	2022-03-13	DAY 10	0	0	1	0	0			(0516)10pups s	10	(0519)6pups	6
	WT-3	(0331) 5pups (0511)11pups (0601)9pups (0622)10pups (0803)10pups (0826)8pups(0915)6pups(1122)4pups									2.36667	71	2022-03-14	DAY 11	0	0	1	0	0			(0529)13pups	13	(0601)7pups	7
	WT-4	(0407) 7pups (0429) 3 pups (0620)8pups(0729)8pups (0928)8pups(1102)7pups(1129)preg15d									2.4	72	2022-03-15	DAY 12	0	0	1	0	0			(0601)9pups	9	(0612)7pups	7
	WT-5	(0404) 7pups (0513)7pups (0610)11pups (0722)11pups(0826)6pups (0924)4pups(1015)4pups									2.43333	73	2022-03-16	DAY 13	0	0	1	0	0			(0610)11pups	11	(0613)4pups	4
	WT-6	(0413)8pups (0516)10pups (0701)8pups (0814)7pups (0915)7pups(1011)5pups(1101)4pups(1128)7pups									2.46667	74	2022-03-17	DAY 14	0	0	1	0	0			(0620)7pups	7	(0617)4pups	4
											2.5	75	2022-03-18	DAY 15	0	0	1	0	0			(0620)8pups	8	(0619)2pups	2
											2.53333	76	2022-03-19	DAY 16	0	0	1	0	0			(0622)10pups	10	(0626)2pups	2
											2.56667	77	2022-03-20	DAY 17	0	0	1	0	0			(0701)8pups	8	(0708)6pups	6
											2.6	78	2022-03-21	DAY 18	0	0	1	0	0			(0714)3pups	3	(0714)6pups	6
											2.63333	79	2022-03-22	DAY 19	0	0	1	0	0			(0717)9pups	9	(0725)7pups	7
											2.66667	80	2022-03-23	DAY 20	0	0	1	0	0			(0722)11pups	11	(0728)8pups	8
											2.7	81	2022-03-24	DAY 21	0	0	1	0	0			(0729)8pups	8	(0803)4pups	4
											2.73333	82	2022-03-25	DAY 22	0	0	1	0	0			(0803)10pups	10	(0807)5pups	5
											2.76667	83	2022-03-26	DAY 23	0	0	1	0	0			(0809)8pups	8	(0809)3pups	3
											2.8	84	2022-03-27	DAY 24	0	0	1	0	0			(0814)7pups	7	(0820)2pups	2
											2.83333	85	2022-03-28	DAY 25	0	0	1	0	0			(0826)11pups	11	(0821)6pups	6
											2.86667	86	2022-03-29	DAY 26	0	0	1	0	0			(0826)6pups	6	(0830)7pups	7
											2.9	87	2022-03-30	DAY 27	0	0	1	0.833333	0			(0826)8pups	8	(0902)8pups	8
											2.93333	88	2022-03-31	DAY 28	0.833333	0	1	0	0			(0915)6pups	6	(0911)6pups	6
											2.96667	89	2022-04-01	DAY 29	0.833333	0	1	0	0			(0915)7pups	7	(0917)2pups	2
											3	90	2022-04-02	DAY 30	0.833333	0	1	0	0			(0916)9pups	9	(0924)4pups	4
											3.03333	91	2022-04-03	DAY 31	0.833333	0	1	1.16667	2.5			(0924)4pups	4	(0924)4pups	4
											3.06667	92	2022-04-04	DAY 32	2	2.5	1	0	1.16667			(0928)8pups	8	(0925) 3pups	3
											3.1	93	2022-04-05	DAY 33	2	3.66667	1	0	0			(1011)5pups	5	(0930)2pups	2		No.of pups per litter(10 month)
											3.13333	94	2022-04-06	DAY 34	2	3.66667	1	1.16667	1.66667			(1015)4pups	4	(1007) 4pups	4
											3.16667	95	2022-04-07	DAY 35	3.16667	5.33333	1	0	0			(1101)4pups	4	(1020)3pups	3		10month	4	3
											3.2	96	2022-04-08	DAY 36	3.16667	5.33333	1	0	0			(1102)7pups	7	(1021)4pups	4		10month	7	4
											3.23333	97	2022-04-09	DAY 37	3.16667	5.33333	1	1.5	0			(1106)4pups	4	(1022) 2 pups	2		10month	4	2
											3.26667	98	2022-04-10	DAY 38	4.66667	5.33333	1	0	0			(1122)4pups	4	(1113)1pups	1		10month	4	1
											3.3	99	2022-04-11	DAY 39	4.66667	5.33333	1	0	0			(1128)6pups	6	(1116)2pups	2		10month	6	2
											3.33333	100	2022-04-12	DAY 40	4.66667	5.33333	1	1.33333	0			(1128)7pup	7	(1117)3 pups	3		10month	7	3
											3.36667	101	2022-04-13	DAY 41	6	5.33333	1	0	0
											3.4	102	2022-04-14	DAY 42	6	5.33333	1	0	0									Clppfl/fl	Clppfl/fl;ZP3-Cre
											3.43333	103	2022-04-15	DAY 43	6	5.33333	1	0	0								AVG	5.33333	2.5
											3.46667	104	2022-04-16	DAY 44	6	5.33333	1	0	0								SEM	0.561084	0.390868
											3.5	105	2022-04-17	DAY 45	6	5.33333	1	0	0
											3.53333	106	2022-04-18	DAY 46	6	5.33333	1	0	1.16667
											3.56667	107	2022-04-19	DAY 47	6	6.5	1	0	0
											3.6	108	2022-04-20	DAY 48	6	6.5	1	0	0
											3.63333	109	2022-04-21	DAY 49	6	6.5	1	0	0
											3.66667	110	2022-04-22	DAY 50	6	6.5	1	0	1.33333
											3.7	111	2022-04-23	DAY 51	6	7.83333	1	0	0
											3.73333	112	2022-04-24	DAY 52	6	7.83333	1	0	0.833333
											3.76667	113	2022-04-25	DAY 53	6	8.66667	1	0	0
											3.8	114	2022-04-26	DAY 54	6	8.66667	1	0	0
											3.83333	115	2022-04-27	DAY 55	6	8.66667	1	0	0
											3.86667	116	2022-04-28	DAY 56	6	8.66667	1	0.5	0
											3.9	117	2022-04-29	DAY 57	6.5	8.66667	1	0	0.166667
											3.93333	118	2022-04-30	DAY 58	6.5	8.83333	1	0	0
											3.96667	119	2022-05-01	DAY 59	6.5	8.83333	1	0	0
											4	120	2022-05-02	DAY 60	6.5	8.83333	1	0	0
											4.03333	121	2022-05-03	DAY 61	6.5	8.83333	1	0	0
											4.06667	122	2022-05-04	DAY 62	6.5	8.83333	1	0	0
											4.1	123	2022-05-05	DAY 63	6.5	8.83333	1	0	0
											4.13333	124	2022-05-06	DAY 64	6.5	8.83333	1	1.66667	0
											4.16667	125	2022-05-07	DAY 65	8.16667	8.83333	1	0	0
											4.2	126	2022-05-08	DAY 66	8.16667	8.83333	1	0	0
											4.23333	127	2022-05-09	DAY 67	8.16667	8.83333	1	0	0
											4.26667	128	2022-05-10	DAY 68	8.16667	8.83333	1	1.83333	0
											4.3	129	2022-05-11	DAY 69	10	8.83333	1	1.5	0
											4.33333	130	2022-05-12	DAY 70	11.5	8.83333	1	1.16667	0
											4.36667	131	2022-05-13	DAY 71	12.6667	8.83333	1	0	0
											4.4	132	2022-05-14	DAY 72	12.6667	8.83333	1	1.66667	0
											4.43333	133	2022-05-15	DAY 73	14.3333	8.83333	1	0	0.833333
											4.46667	134	2022-05-16	DAY 74	14.3333	9.66667	1	0	0
											4.5	135	2022-05-17	DAY 75	14.3333	9.66667	1	0	0
											4.53333	136	2022-05-18	DAY 76	14.3333	9.66667	1	0	0.333333
											4.56667	137	2022-05-19	DAY 77	14.3333	10	1	0	1
											4.6	138	2022-05-20	DAY 78	14.3333	11	1	0	0
											4.63333	139	2022-05-21	DAY 79	14.3333	11	1	0	0
											4.66667	140	2022-05-22	DAY 80	14.3333	11	1	0	0
											4.7	141	2022-05-23	DAY 81	14.3333	11	1	0	0
											4.73333	142	2022-05-24	DAY 82	14.3333	11	1	0	0
											4.76667	143	2022-05-25	DAY 83	14.3333	11	1	0	0
											4.8	144	2022-05-26	DAY 84	14.3333	11	1	0	0
											4.83333	145	2022-05-27	DAY 85	14.3333	11	1	0	0
											4.86667	146	2022-05-28	DAY 86	14.3333	11	1	2.16667	0
											4.9	147	2022-05-29	DAY 87	16.5	11	1	0	0
											4.93333	148	2022-05-30	DAY 88	16.5	11	1	0	0
											4.96667	149	2022-05-31	DAY 89	16.5	11	1	1	1.16667
											5	150	2022-06-01	DAY 90	17.5	12.1667	1	0	0
											5.03333	151	2022-06-02	DAY 91	17.5	12.1667	1	0	0
											5.06667	152	2022-06-03	DAY 92	17.5	12.1667	1	0	0
											5.1	153	2022-06-04	DAY 93	17.5	12.1667	1	0	0
											5.13333	154	2022-06-05	DAY 94	17.5	12.1667	1	0	0
											5.16667	155	2022-06-06	DAY 95	17.5	12.1667	1	0	0
											5.2	156	2022-06-07	DAY 96	17.5	12.1667	1	0	0
											5.23333	157	2022-06-08	DAY 97	17.5	12.1667	1	0	0
											5.26667	158	2022-06-09	DAY 98	17.5	12.1667	1	1.83333	0
											5.3	159	2022-06-10	DAY 99	19.3333	12.1667	1	0	0
											5.33333	160	2022-06-11	DAY 100	19.3333	12.1667	1	0	1.16667
											5.36667	161	2022-06-12	DAY 101	19.3333	13.3333	1	0	0.666667
											5.4	162	2022-06-13	DAY 102	19.3333	14	1	0	0
											5.43333	163	2022-06-14	DAY 103	19.3333	14	1	0	0
											5.46667	164	2022-06-15	DAY 104	19.3333	14	1	0	0
											5.5	165	2022-06-16	DAY 105	19.3333	14	1	0	0.666667
											5.53333	166	2022-06-17	DAY 106	19.3333	14.6667	1	0	0
											5.56667	167	2022-06-18	DAY 107	19.3333	14.6667	1	0	0
											5.6	168	2022-06-19	DAY 108	19.3333	14.6667	1	2.5	0
											5.63333	169	2022-06-20	DAY 109	21.8333	14.6667	1	0	0
											5.66667	170	2022-06-21	DAY 110	21.8333	14.6667	1	1.66667	0
											5.7	171	2022-06-22	DAY 111	23.5	14.6667	1	0	0
											5.73333	172	2022-06-23	DAY 112	23.5	14.6667	1	0	0
											5.76667	173	2022-06-24	DAY 113	23.5	14.6667	1	0	0
											5.8	174	2022-06-25	DAY 114	23.5	14.6667	1	0	0.333333
											5.83333	175	2022-06-26	DAY 115	23.5	15	1	0	0
											5.86667	176	2022-06-27	DAY 116	23.5	15	1	0	0
											5.9	177	2022-06-28	DAY 117	23.5	15	1	0	0
											5.93333	178	2022-06-29	DAY 118	23.5	15	1	0	0
											5.96667	179	2022-06-30	DAY 119	23.5	15	1	1.33333	0
											6	180	2022-07-01	DAY 120	24.8333	15	1	0	0
											6.03333	181	2022-07-02	DAY 121	24.8333	15	1	0	0
											6.06667	182	2022-07-03	DAY 122	24.8333	15	1	0	0
											6.1	183	2022-07-04	DAY 123	24.8333	15	1	0	0
											6.13333	184	2022-07-05	DAY 124	24.8333	15	1	0	0
											6.16667	185	2022-07-06	DAY 125	24.8333	15	1	0	0
											6.2	186	2022-07-07	DAY 126	24.8333	15	1	0	1
											6.23333	187	2022-07-08	DAY 127	24.8333	16	1	0	0
											6.26667	188	2022-07-09	DAY 128	24.8333	16	1	0	0
											6.3	189	2022-07-10	DAY 129	24.8333	16	1	0	0
											6.33333	190	2022-07-11	DAY 130	24.8333	16	1	0	0
											6.36667	191	2022-07-12	DAY 131	24.8333	16	1	0	0
											6.4	192	2022-07-13	DAY 132	24.8333	16	1	0.5	1
											6.43333	193	2022-07-14	DAY 133	25.3333	17	1	0	0
											6.46667	194	2022-07-15	DAY 134	25.3333	17	1	0	0
											6.5	195	2022-07-16	DAY 135	25.3333	17	1	1.5	0
											6.53333	196	2022-07-17	DAY 136	26.8333	17	1	0	0
											6.56667	197	2022-07-18	DAY 137	26.8333	17	1	0	0
											6.6	198	2022-07-19	DAY 138	26.8333	17	1	0	0
											6.63333	199	2022-07-20	DAY 139	26.8333	17	1	0	0
											6.66667	200	2022-07-21	DAY 140	26.8333	17	1	1.83333	0
											6.7	201	2022-07-22	DAY 141	28.6667	17	1	0	0
											6.73333	202	2022-07-23	DAY 142	28.6667	17	1	0	0
											6.76667	203	2022-07-24	DAY 143	28.6667	17	1	0	1.16667
											6.8	204	2022-07-25	DAY 144	28.6667	18.1667	1	0	0
											6.83333	205	2022-07-26	DAY 145	28.6667	18.1667	1	0	0
											6.86667	206	2022-07-27	DAY 146	28.6667	18.1667	1	0	1.33333
											6.9	207	2022-07-28	DAY 147	28.6667	19.5	1	1.33333	0
											6.93333	208	2022-07-29	DAY 148	30	19.5	1	0	0
											6.96667	209	2022-07-30	DAY 149	30	19.5	1	0	0
											7	210	2022-07-31	DAY 150	30	19.5	1	0	0
											7.03333	211	2022-08-01	DAY 151	30	19.5	1	1.66667	0
											7.06667	212	2022-08-02	DAY 152	31.6667	19.5	1	0	0.666667
											7.1	213	2022-08-03	DAY 153	31.6667	20.1667	1	0	0
											7.13333	214	2022-08-04	DAY 154	31.6667	20.1667	1	0	0
											7.16667	215	2022-08-05	DAY 155	31.6667	20.1667	1	0	0
											7.2	216	2022-08-06	DAY 156	31.6667	20.1667	1	0	0.833333
											7.23333	217	2022-08-07	DAY 157	31.6667	21	1	0	0
											7.26667	218	2022-08-08	DAY 158	31.6667	21	1	1.33333	0.5
											7.3	219	2022-08-09	DAY 159	33	21.5	1	0	0
											7.33333	220	2022-08-10	DAY 160	33	21.5	1	0	0
											7.36667	221	2022-08-11	DAY 161	33	21.5	1	0	0
											7.4	222	2022-08-12	DAY 162	33	21.5	1	0	0
											7.43333	223	2022-08-13	DAY 163	33	21.5	1	1.16667	0
											7.46667	224	2022-08-14	DAY 164	34.1667	21.5	1	0	0
											7.5	225	2022-08-15	DAY 165	34.1667	21.5	1	0	0
											7.53333	226	2022-08-16	DAY 166	34.1667	21.5	1	0	0
											7.56667	227	2022-08-17	DAY 167	34.1667	21.5	1	0	0
											7.6	228	2022-08-18	DAY 168	34.1667	21.5	1	0	0
											7.63333	229	2022-08-19	DAY 169	34.1667	21.5	1	0	0.333333
											7.66667	230	2022-08-20	DAY 170	34.1667	21.8333	1	0	1
											7.7	231	2022-08-21	DAY 171	34.1667	22.8333	1	0	0
											7.73333	232	2022-08-22	DAY 172	34.1667	22.8333	1	0	0
											7.76667	233	2022-08-23	DAY 173	34.1667	22.8333	1	0	0
											7.8	234	2022-08-24	DAY 174	34.1667	22.8333	1	0	0
											7.83333	235	2022-08-25	DAY 175	34.1667	22.8333	1	1	0
											7.86667	236	2022-08-26	DAY 176	35.1667	22.8333	1	1.83333	0
											7.9	237	2022-08-27	DAY 177	37	22.8333	1	1.33333	0
											7.93333	238	2022-08-28	DAY 178	38.3333	22.8333	1	0	0
											7.96667	239	2022-08-29	DAY 179	38.3333	22.8333	1	0	1.16667
											8	240	2022-08-30	DAY 180	38.3333	24	1	0	0
											8.03333	241	2022-08-31	DAY 181	38.3333	24	1	0	0
											8.06667	242	2022-09-01	DAY 182	38.3333	24	1	0	1.33333
											8.1	243	2022-09-02	DAY 183	38.3333	25.3333	1	0	0
											8.13333	244	2022-09-03	DAY 184	38.3333	25.3333	1	0	0
											8.16667	245	2022-09-04	DAY 185	38.3333	25.3333	1	0	0
											8.2	246	2022-09-05	DAY 186	38.3333	25.3333	1	0	0
											8.23333	247	2022-09-06	DAY 187	38.3333	25.3333	1	0	0
											8.26667	248	2022-09-07	DAY 188	38.3333	25.3333	1	0	0
											8.3	249	2022-09-08	DAY 189	38.3333	25.3333	1	0	0
											8.33333	250	2022-09-09	DAY 190	38.3333	25.3333	1	0	0
											8.36667	251	2022-09-10	DAY 191	38.3333	25.3333	1	0	1
											8.4	252	2022-09-11	DAY 192	38.3333	26.3333	1	0	0
											8.43333	253	2022-09-12	DAY 193	38.3333	26.3333	1	0	0
											8.46667	254	2022-09-13	DAY 194	38.3333	26.3333	1	1	0
											8.5	255	2022-09-14	DAY 195	39.3333	26.3333	1	1.16667	0
											8.53333	256	2022-09-15	DAY 196	40.5	26.3333	1	1.5	0
											8.56667	257	2022-09-16	DAY 197	42	26.3333	1	0	0.333333
											8.6	258	2022-09-17	DAY 198	42	26.6667	1	0	0
											8.63333	259	2022-09-18	DAY 199	42	26.6667	1	0	0
											8.66667	260	2022-09-19	DAY 200	42	26.6667	1	0	0
											8.7	261	2022-09-20	DAY 201	42	26.6667	1	0	0
											8.73333	262	2022-09-21	DAY 202	42	26.6667	1	0	0
											8.76667	263	2022-09-22	DAY 203	42	26.6667	1	0	0
											8.8	264	2022-09-23	DAY 204	42	26.6667	1	0.666667	0.666667
											8.83333	265	2022-09-24	DAY 205	42.6667	27.3333	1	0	0.666667
											8.86667	266	2022-09-25	DAY 206	42.6667	28	1	0	0.5
											8.9	267	2022-09-26	DAY 207	42.6667	28.5	1	0	0
											8.93333	268	2022-09-27	DAY 208	42.6667	28.5	1	1.33333	0
											8.96667	269	2022-09-28	DAY 209	44	28.5	1	0	0
											9	270	2022-09-29	DAY 210	44	28.5	1	0	0.333333
											9.03333	271	2022-09-30	DAY 211	44	28.8333	1	0	0
											9.06667	272	2022-10-01	DAY 212	44	28.8333	1	0	0
											9.1	273	2022-10-02	DAY 213	44	28.8333	1	0	0
											9.13333	274	2022-10-03	DAY 214	44	28.8333	1	0	0
											9.16667	275	2022-10-04	DAY 215	44	28.8333	1	0	0
											9.2	276	2022-10-05	DAY 216	44	28.8333	1	0	0
											9.23333	277	2022-10-06	DAY 217	44	28.8333	1	0	0.666667
											9.26667	278	2022-10-07	DAY 218	44	29.5	1	0	0
											9.3	279	2022-10-08	DAY 219	44	29.5	1	0	0
											9.33333	280	2022-10-09	DAY 220	44	29.5	1	0	0
											9.36667	281	2022-10-10	DAY 221	44	29.5	1	0.833333	0
											9.4	282	2022-10-11	DAY 222	44.8333	29.5	1	0	0
											9.43333	283	2022-10-12	DAY 223	44.8333	29.5	1	0	0
											9.46667	284	2022-10-13	DAY 224	44.8333	29.5	1	0	0
											9.5	285	2022-10-14	DAY 225	44.8333	29.5	1	0.666667	0
											9.53333	286	2022-10-15	DAY 226	45.5	29.5	1	0	0
											9.56667	287	2022-10-16	DAY 227	45.5	29.5	1	0	0
											9.6	288	2022-10-17	DAY 228	45.5	29.5	1	0	0
											9.63333	289	2022-10-18	DAY 229	45.5	29.5	1	0	0
											9.66667	290	2022-10-19	DAY 230	45.5	29.5	1	0	0.5
											9.7	291	2022-10-20	DAY 231	45.5	30	1	0	0.666667
											9.73333	292	2022-10-21	DAY 232	45.5	30.6667	1	0	0.333333
											9.76667	293	2022-10-22	DAY 233	45.5	31	1	0	0
											9.8	294	2022-10-23	DAY 234	45.5	31	1	0	0
											9.83333	295	2022-10-24	DAY 235	45.5	31	1	0	0
											9.86667	296	2022-10-25	DAY 236	45.5	31	1	0	0
											9.9	297	2022-10-26	DAY 237	45.5	31	1	0	0
											9.93333	298	2022-10-27	DAY 238	45.5	31	1	0	0
											9.96667	299	2022-10-28	DAY 239	45.5	31	1	0	0
											10	300	2022-10-29	DAY 240	45.5	31	1	0	0
											10.0333	301	2022-10-30	DAY 241	45.5	31	1	0	0
											10.0667	302	2022-10-31	DAY 242	45.5	31	1	1.83333	0
											10.1	303	2022-11-01	DAY 243	47.3333	31	1	0	0
											10.1333	304	2022-11-02	DAY 244	47.3333	31	1	0	0
											10.1667	305	2022-11-03	DAY 245	47.3333	31	1	0	0
											10.2	306	2022-11-04	DAY 246	47.3333	31	1	0	0
											10.2333	307	2022-11-05	DAY 247	47.3333	31	1	0.666667	0
											10.2667	308	2022-11-06	DAY 248	48	31	1	0	0
											10.3	309	2022-11-07	DAY 249	48	31	1	0	0
											10.3333	310	2022-11-08	DAY 250	48	31	1	0	0
											10.3667	311	2022-11-09	DAY 251	48	31	1	0	0
											10.4	312	2022-11-10	DAY 252	48	31	1	0	0
											10.4333	313	2022-11-11	DAY 253	48	31	1	0	0
											10.4667	314	2022-11-12	DAY 254	48	31	1	0	0.166667
											10.5	315	2022-11-13	DAY 255	48	31.1667	1	0	0
											10.5333	316	2022-11-14	DAY 256	48	31.1667	1	0	0
											10.5667	317	2022-11-15	DAY 257	48	31.1667	1	0	0.333333
											10.6	318	2022-11-16	DAY 258	48	31.5	1	0	0.5
											10.6333	319	2022-11-17	DAY 259	48	32	1	0	0
											10.6667	320	2022-11-18	DAY 260	48	32	1	0	0
											10.7	321	2022-11-19	DAY 261	48	32	1	0	0
											10.7333	322	2022-11-20	DAY 262	48	32	1	0	1
											10.7667	323	2022-11-21	DAY 263	48	33	1	0.666667	0
											10.8	324	2022-11-22	DAY 264	48.6667	33	1	0	0
											10.8333	325	2022-11-23	DAY 265	48.6667	33	1	0	0
											10.8667	326	2022-11-24	DAY 266	48.6667	33	1	0	0
											10.9	327	2022-11-25	DAY 267	48.6667	33	1	0	0
											10.9333	328	2022-11-26	DAY 268	48.6667	33	1	1	0
											10.9667	329	2022-11-27	DAY 269	49.6667	33	1	1.16667	0
											11	330	2022-11-28	DAY 270	50.8333	33	2
