# Supplementary material for: Mitochondrial stress response gene Clpp deficiency impairs oocyte competence and deteriorate cyclophosphamide-induced ovarian damage in young mice
Source: Front Endocrinol (Lausanne). 2023 Mar 24;14:1122012. doi: 10.3389/fendo.2023.1122012 (PMC10081448; doi:10.3389/fendo.2023.1122012)
Supplement: Supplementary file 3 [file Table_2.xlsx]

## Sheet: Fig 2 B 
		Primordial FC	Primary FC	Secondary FC	Antral FC	Corpora lutea	Atretic FC		*5		Primordial FC	Primary FC	Secondary FC	Antral FC	Corpora lutea	Atretic FC
cko-1	page-1	24	9	6	2	3	2			page-1	120	9	6	2	3	10			Fig 2-B
	page-2	16	11	6	1	2	5			page-2	80	11	6	1	2	25			Follicle count
	page-3	22	10	12	5	0	4			page-3	110	10	12	5	0	20
	page-4	16	6	5	2	4	3			page-4	80	6	5	2	4	15
		78	36	29	10	9	14	176			390	36	29	10	9	70	544
		44.3182	20.4545	16.4773	5.68182	5.11364	7.95455				71.6912	6.61765	5.33088	1.83824	1.65441	12.8676
																				Primordial FC	Primary FC	Secondary FC	Antral FC	Corpora lutea	Atretic FC
																			cko-1	390	36	29	10	9	70
																			cko-2	380	33	24	9	10	75
cko-2	page-1	27	5	4	1	1	3			page-1	135	5	4	1	1	15			cko-3	445	33	29	15	15	90
	page-2	13	14	3	4	3	4			page-2	65	14	3	4	3	20
	page-3	28	1	9	3	1	6			page-3	140	1	9	3	1	30
	page-4	8	4	8	1	5	2			page-4	40	4	8	1	5	10			WT-1	385	44	35	21	12	50
		76	33	24	9	10	15	167			380	33	24	9	10	75	531		WT-2	425	49	45	29	19	60
		45.509	19.7605	14.3713	5.38922	5.98802	8.98204				71.5631	6.21469	4.51977	1.69492	1.88324	14.1243			WT-3	410	43	34	17	16	55
																				WT-1	WT-2	WT-3	cko-1	cko-2	cko-3
cko-2	page-1	24	4	6	3	6	3			page-1	120	4	6	3	6	15			Primordial FC	385	425	410	390	380	445
	page-2	22	12	9	5	2	4			page-2	110	12	9	5	2	20			Primary FC	44	49	43	36	33	33
	page-3	25	8	11	4	4	6			page-3	125	8	11	4	4	30			Secondary FC	35	45	34	29	24	29
	page-4	18	9	3	3	3	5			page-4	90	9	3	3	3	25			Antral FC	21	29	17	10	9	15
		89	33	29	15	15	18	199			445	33	29	15	15	90	627		Corpora lutea	12	19	16	9	10	15
		44.7236	16.5829	14.5729	7.53769	7.53769	9.04523				70.9729	5.26316	4.6252	2.39234	2.39234	14.3541			Atretic FC	50	60	55	70	75	90
WT-1	page-1	22	15	12	7	10	3			page-1	110	15	12	7	10	15
	page-2	28	20	14	9	2	4			page-2	140	20	14	9	2	20
	page-3	27	9	9	5	0	3			page-3	135	9	9	5	0	15
		77	44	35	21	12	10	199			385	44	35	21	12	50	547
		38.6935	22.1106	17.5879	10.5528	6.03015	5.02513				70.3839	22.1106	17.5879	10.5528	6.03015	9.14077
WT-2	page-1	23	16	13	5	7	3			page-1	115	16	13	5	7	15
	page-2	25	15	12	11	1	3			page-2	125	15	12	11	1	15
	page-3	11	10	9	7	6	2			page-3	55	10	9	7	6	10
	page-4	26	8	11	6	5	4			page-4	130	8	11	6	5	20
		85	49	45	29	19	12	239			425	49	45	29	19	60	627
		35.5649	20.5021	18.8285	12.1339	7.94979	5.02092				67.7831	7.81499	7.17703	4.6252	3.0303	9.56938
WT-3	page-1	23	12	11	6	12	2			page-1	115	12	11	6	12	10
	page-2	29	21	12	4	2	5			page-2	145	21	12	4	2	25
	page-3	30	10	11	7	2	4			page-3	150	10	11	7	2	20
		82	43	34	17	16	11	203			410	43	34	17	16	55	575
		40.3941	21.1823	16.7488	8.37438	7.88177	5.41872				71.3043	21.1823	16.7488	8.37438	7.88177	9.56522

## Sheet: Fig 2 C,D,E
Fig 2-C			Fig 2-D			Fig 2-E
MII oocyte number			2-cell-oocyte number			BL number
Clppfl/fl	Clppfl/fl;Zp3-cre		Clppfl/fl	Clppfl/fl;Zp3-cre		Clppfl/fl	Clppfl/fl;Zp3-cre
25	9		6	16		6	9
15	6		11	17		10	15
20	6		16	16		16	14
21	16					9	8
15	6					7	7
25	17					6	10
21	10						12
25	14
37	21
24	36
	27
	29
	33
	13
	27

## Sheet: Fig 2 G
		good Good means that the oocyte spindle is in normal shape, while bed means abnormal spindle shape.
	Clppfl/fl-1	Clppfl/fl-2	Clppfl/fl-3	Clppfl/fl-4	Clppfl/fl-5	Clppfl/fl;Zp3-cre-1	Clppfl/fl;Zp3-cre-2	Clppfl/fl;Zp3-cre-3	Clppfl/fl;Zp3-cre-4	Clppfl/fl;Zp3-cre-5		Fig 2-G
												Abnormal spindle rate (%)
(bed/good)*100	4.54545	8.33333	10.3448	12	11.5385	22.2222	60	100	75	66.6667		Clppfl/fl	Clppfl/fl;Zp3-cre
bed/good	0.0454545	0.0833333	0.103448	0.12	0.115385	0.222222	0.6	1	0.75	0.666667		4.54545	22.2222
												8.33333	60
	good	good	good	good	good	bed	bed	bed	bed	bed		10.3448	100
	bed	good	good	good	good	good	bed	bed	good	bed		12	75
	good	good	good	good	good	good	bed	bed	bed	bed		11.5385	66.6667
	good	good	bed	bed	bed	good	good	bed	bed	good
	good	bed	good	good	good	bed	good	bed	bed	bed
	good	good	good	good	good	good	good	bed	good	good
	good	good	good	good	good	good	bed	bed	bed	good
	good	good	good	good	good	good	bed	bed	bed	bed
	good	good	good	good	good	good	bed	bed	good	bed
	good	good	good	good	good	good	good	bed	bed	good
	good	good	good	good	good	bed	good	bed	bed	bed
	good	good	good	good	good	good	bed	bed	good	bed
	good		good	good	good	good	bed		bed	bed
	good		bed	bed	bed	good	bed		bed	bed
	good		good	good	good	good	good		bed	good
	good		good	good	good	good			bed	bed
	good		good	good	good	bed				bed
	good		bed	bed	bed	good				good
	good		good	good	good
	good		good	good	good
	good		good	good	good
	good		good	good	good
			good	good	good
			good	good	good
			good	good	good
			good		good
			good
			good
			good

## Sheet: Fig 2 I
Chromosome number = 20 is the normal number of chromosomes, and the others are abnormal numbers, which are recorded as aneuploid oocytes
Clppfl/fl-1	Clppfl/fl-2	Clppfl/fl-3	Clppfl/fl;Zp3-cre-1	Clppfl/fl;Zp3-cre-2	Clppfl/fl;Zp3-cre-3
0.266667	0.3125	0.294118	0.583333	0.666667	0.588235		Fig 2-G
							Aneuploidy rate （%）
18	19	18	20	17	19		Clppfl/fl	Clppfl/fl;Zp3-cre
20	20	20	17	15	20		0.266667	0.583333
20	19	20	19	20	14		0.3125	0.666667
20	16	20	20	20	17		0.294118	0.588235
20	18	20	20	17	20
20	20	19	15	20	20
20	20	20	14	20	19
20	20	20	18	19	18
19	20	20	20	18	15
18	20	20	18	19	19
19	18	20	19	17	17
20	20	20	20	19	20
20	20	18		20	20
20	20	20		14	17
20	20	19		20	18
	20	18			20
		20			20
