# Supplementary material for: Mitochondrial stress response gene Clpp deficiency impairs oocyte competence and deteriorate cyclophosphamide-induced ovarian damage in young mice
Source: Front Endocrinol (Lausanne). 2023 Mar 24;14:1122012. doi: 10.3389/fendo.2023.1122012 (PMC10081448; doi:10.3389/fendo.2023.1122012)
Supplement: Supplementary file 4 [file Table_3.xlsx]

## Sheet: Fig 3 D
Fig 3-D
JC-1 Red/Green Fluorescent intensity distribution Rate
Clppfl/fl-1	Clppfl/fl-2	Clppfl/fl-3	Clppfl/fl;Zp3-cre-1	Clppfl/fl;Zp3-cre-2	Clppfl/fl;Zp3-cre-3
1.60178	2.64743	2.12719	0.68649	1.29055	1.30782
2.40659	2.66364	2.28511	0.205536	1.01342	0.574096
2.77068	2.50148	1.94677	1.00676	0.307332	1.34908		AVG	2.33414	0.951315
2.77207	2.13141	2.26388	1.62728	0.638335	1.08543		SEM	0.0574422	0.0897715
2.48948	2.1476	2.42175	2.00184	1.06333	0.992068
2.72576	2.44069	2.34814	0.522819	1.73263	1.43666
2.30121	2.44182	2.2422	0.844839	1.11543	0.426244
2.37544	1.96909		1.0958	0.497677	0.649079
1.99806			1.0196		0.244046

## Sheet: Fig 3 E
Fig 3-E
Ros level
Clppfl/fl-1	Clppfl/fl-2	Clppfl/fl-3	Clppfl/fl;Zp3-cre-1	Clppfl/fl;Zp3-cre-2	Clppfl/fl;Zp3-cre-3
0.89	0.75	1.26	1.11	1.33	1.02
0.7	0.71	1.23	1.12	0.96	1.51
0.84	0.91	0.87	1.35	1.35	0.99
0.62	1.26	1.14	0.78	1.39	1.17		AVG	0.732308	1.16769
0.63	0.71	0.51	1.38	1.15	1.55		SEM	0.0632042	0.0445268
0.93	0.82	0.89	1.17	0.75	1.19
0.06	0.95	0.75	1.07	1.02	1.1
0.43		0.21	0.82	0.93	1.43
		0.61	1.59	1.13
		0.12
		0.24

## Sheet: Fig 3 F
Fig 3-F
Abnormal mitochondrail distribution Rate
Clppfl/fl-1	Clppfl/fl-2	Clppfl/fl-3	Clppfl/fl;Zp3-cre-1	Clppfl/fl;Zp3-cre-2	Clppfl/fl;Zp3-cre-3
0.166667	0.181818	0.25	0.45	0.444444	0.555556
								Fig 3-F
1	1	1	1	1	1			Abnormal mitochondrail distribution Rate
1	1	1	0	0	0
1	1	0	1	1	0			Clppfl/fl	Clppfl/fl;Zp3-cre
1	1	1	0	0	0			0.166667	0.45
1	1	0	1	1	1			0.181818	0.444444
1	0	1	0	0	0			0.25	0.555556
1	1	1	1	0	0
0	1	1	0	1	0
1	1	1	1	0	1
1	0	0	0	1	0
1	1	1	1	1	1		AVG	0.199495	0.483333
1	1	1	0	0	1		SEM	0.0209256	0.0295137
0	1	0	1	1	0
1	1	1	0	0	1
1	0	0	1	1	1
1	1	1	0	0	0
1	1	1	1	1	1
0	0	1	0	1	0
	1	1	1
	1	1	1
	1

## Sheet: Fig 3 G
Fig 3-G
mtDNA copy number
Clppfl/fl-1	Clppfl/fl-2	Clppfl/fl-3	Clppfl/fl;Zp3-cre-1	Clppfl/fl;Zp3-cre-2	Clppfl/fl;Zp3-cre-3
56371.9	170029	82961	488662	338990	449831
154373	159792	126377	378559	329762	99262.8
163134	146082		251960	250228
AVG	132390	323407
SEM	27941.1	55836.3

## Sheet: Fig 3 H
Fig 3 H
quantification of mRNA expression of respiratory chian complex genes
			CT1
	WT-1	ndufv1	29.2673
	WT-1	ndufv1	29.2484			SampleType	WT-1	WT-2	WT-3	CKO-1	CKO-2	CKO-3
	WT-1	ndufv1	29.2978			beta-actin	29.6943	29.4745	29.6795	27.583	27.5616	27.4389
	WT-2	ndufv1	29.11				29.7015	29.4217	29.723	27.5767	27.5162	27.4603
	WT-2	ndufv1	29.2785				29.7939	29.4141	29.6563	27.5544	27.5493	27.4798
	WT-2	ndufv1	29.7354			ndufv1	29.2673	29.11	29.642	27.9686	27.8038	27.9252			WT-1	WT-2	WT-3	CKO-1	CKO-2	CKO-3
	WT-3	ndufv1	29.642				29.2484	29.2785	29.1256	27.8027	27.9493	27.9084		ndufv1	1.1783	0.895117	0.92658	0.696683	0.665849	0.617314
	WT-3	ndufv1	29.1256				29.2978	29.7354	29.9552	27.841	27.9681	27.9672		sdhb	1.13476	0.955017	0.910219	0.23387	0.255341	0.250245
	WT-3	ndufv1	29.9552			sdhb	24.001	23.9653	24.2873	23.9608	23.9546	23.8866		uqcrc2	1.04058	0.849034	1.11651	1.65488	1.29466	1.54537
	CKO-1	ndufv1	27.9686				23.9635	23.9058	24.24	24.1597	23.9579	23.8954		cox1	0.977245	0.843637	1.17912	1.18343	1.06601	1.12293
	CKO-1	ndufv1	27.8027				23.9723	23.933	24.2331	24.1767	23.9175	23.8873		atp5a1	1.14776	1.07451	0.777738	0.658895	0.559372	0.643903
	CKO-1	ndufv1	27.841			uqcrc2	29.7343	29.7343	29.2862	26.7989	27.0706	26.7731
	CKO-2	ndufv1	27.8038				29.2012	29.4153	29.1574	26.7676	27.1269	26.7775
	CKO-2	ndufv1	27.9493				29.8725	29.6597	29.9287	26.7579	27.1024	26.7351
	CKO-2	ndufv1	27.9681			cox1	34.5953	34.4408	34.2721	32.1612	32.2755	32.0547
	CKO-3	ndufv1	27.9252				34.5868	34.5436	34.2732	32.1111	32.29	32.135
	CKO-3	ndufv1	27.9084				34.585	34.5397	34.2783	32.1907	32.2628	32.1654
	CKO-3	ndufv1	27.9672			atp5a1	27.2012	27.0089	27.7032	25.8528	26.0547	25.7789
	WT-1	sdhb	24.001				27.2376	27.0099	27.7377	25.8492	26.0571	25.739
	WT-1	sdhb	23.9635				27.1747	27.0009	27.7263	25.8381	26.0501	25.7868
	WT-1	sdhb	23.9723
	WT-2	sdhb	23.9653
	WT-2	sdhb	23.9058				WT	WT	WT	CKO	CKO	CKO
	WT-2	sdhb	23.933			beta-actin	29.7299	29.4368	29.6863	27.5714	27.5424	27.4597
	WT-3	sdhb	24.2873
	WT-3	sdhb	24.24
	WT-3	sdhb	24.2331			ndufv1	29.2711	29.3746	29.5743	27.8708	27.9071	27.9336
	CKO-1	sdhb	23.9608				-0.458731	-0.0621694	-0.112009	0.299405	0.364713	0.473902
	CKO-1	sdhb	24.1597				-0.21097
	CKO-1	sdhb	24.1767				-0.247761	0.148801	0.0989606	0.510375	0.575683	0.684872
	CKO-2	sdhb	23.9546				1.18736	0.902	0.933705	0.70204	0.670969	0.622061
	CKO-2	sdhb	23.9579				1.00769
	CKO-2	sdhb	23.9175				1.1783	0.895117	0.92658	0.696683	0.665849	0.617314
	CKO-3	sdhb	23.8866			AVG	1			0.659948
	CKO-3	sdhb	23.8954			SEM	0.0731685			0.0188618
	CKO-3	sdhb	23.8873
	WT-1	uqcrc2	29.7343			sdhb	23.979	23.9347	24.2535	24.0991	23.9433	23.8897
	WT-1	uqcrc2	29.2012				-5.75091	-5.50212	-5.43281	-3.4723	-3.59902	-3.56994
	WT-1	uqcrc2	29.8725				-5.56195
	WT-2	uqcrc2	29.7343				-0.188966	0.059827	0.129139	2.08965	1.96293	1.99201
	WT-2	uqcrc2	29.4153				1.13995	0.959379	0.914377	0.234938	0.256507	0.251388
	WT-2	uqcrc2	29.6597				1.00457
	WT-3	uqcrc2	29.2862				1.13476	0.955017	0.910219	0.23387	0.255341	0.250245
	WT-3	uqcrc2	29.1574			AVG	1			0.246486
	WT-3	uqcrc2	29.9287			SEM	0.0560211			0.00528837
	CKO-1	uqcrc2	26.7989
	CKO-1	uqcrc2	26.7676			uqcrc2	29.6027	29.6031	29.4575	26.7748	27.1	26.7619
	CKO-1	uqcrc2	26.7579				-0.127209	0.166288	-0.228809	-0.796546	-0.442396	-0.697774
	CKO-2	uqcrc2	27.0706				-0.0632436
	CKO-2	uqcrc2	27.1269				-0.0639657	0.229532	-0.165566	-0.733302	-0.379152	-0.634531
	CKO-2	uqcrc2	27.1024				1.04534	0.852912	1.12161	1.66244	1.30058	1.55243
	CKO-3	uqcrc2	26.7731				1.00662
	CKO-3	uqcrc2	26.7775				1.04058	0.849034	1.11651	1.65488	1.29466	1.54537
	CKO-3	uqcrc2	26.7351			AVG	1.00204			1.49831
	WT-1	cox1	34.5953			SEM	0.0649777			0.0870513
	WT-1	cox1	34.5868
	WT-1	cox1	34.585			cox1	34.589	34.508	34.2745	32.1543	32.2761	32.1183
	WT-2	cox1	34.4408				4.85915	5.07125	4.58823	4.58297	4.73372	4.65867
	WT-2	cox1	34.5436				4.83955
	WT-2	cox1	34.5397				0.0196065	0.231704	-0.25131	-0.25657	-0.105824	-0.180876
	WT-3	cox1	34.2721				0.986502	0.851628	1.19029	1.19464	1.07611	1.13357
	WT-3	cox1	34.2732				1.00947
	WT-3	cox1	34.2783				0.977245	0.843637	1.17912	1.18343	1.06601	1.12293
	CKO-1	cox1	32.1612			AVG	1			1.12412
	CKO-1	cox1	32.1111			SEM	0.0796176			0.0276792
	CKO-1	cox1	32.1907
	CKO-2	cox1	32.2755			atp5a1	27.2045	27.0066	27.7224	25.8467	26.0539	25.7682
	CKO-2	cox1	32.29				-2.52535	-2.43021	-1.96389	-1.72466	-1.48842	-1.69145
	CKO-2	cox1	32.2628				-2.30648
	CKO-3	cox1	32.0547				-0.218866	-0.123726	0.342593	0.581827	0.818068	0.615033
	CKO-3	cox1	32.135				1.16382	1.08955	0.788623	0.668117	0.567201	0.652915
	CKO-3	cox1	32.1654				1.014
	WT-1	atp5a1	27.2012				1.14776	1.07451	0.777738	0.658895	0.559372	0.643903
	WT-1	atp5a1	27.2376			AVG	1			0.620724
	WT-1	atp5a1	27.1747			SEM	0.0923661			0.0252946
	WT-2	atp5a1	27.0089
	WT-2	atp5a1	27.0099
	WT-2	atp5a1	27.0009				29.7343	29.7343	29.2862	26.7989	27.0706	26.7731
	WT-3	atp5a1	27.7032				29.2012	29.4153	29.1574	26.7676	27.1269	26.7775
	WT-3	atp5a1	27.7377				29.8725	29.6597	29.9287	26.7579	27.1024	26.7351
	WT-3	atp5a1	27.7263
	CKO-1	atp5a1	25.8528
	CKO-1	atp5a1	25.8492
	CKO-1	atp5a1	25.8381
	CKO-2	atp5a1	26.0547
	CKO-2	atp5a1	26.0571
	CKO-2	atp5a1	26.0501
	CKO-3	atp5a1	25.7789
	CKO-3	atp5a1	25.739
	CKO-3	atp5a1	25.7868
	WT-1	β-actin	29.6943
	WT-1	β-actin	29.7015
	WT-1	β-actin	29.7939
	WT-2	β-actin	29.4745
	WT-2	β-actin	29.4217
	WT-2	β-actin	29.4141
	WT-3	β-actin	29.6795
	WT-3	β-actin	29.723
	WT-3	β-actin	29.6563
	CKO-1	β-actin	27.583
	CKO-1	β-actin	27.5767
	CKO-1	β-actin	27.5544
	CKO-2	β-actin	27.5616
	CKO-2	β-actin	27.5162
	CKO-2	β-actin	27.5493
	CKO-3	β-actin	27.4389
	CKO-3	β-actin	27.4603
	CKO-3	β-actin	27.4798

## Sheet: Fig 3 I
Fig 3 I
ATP level
Clppfl/fl-1	Clppfl/fl-2	Clppfl/fl-3	Clppfl/fl;Zp3-cre-1	Clppfl/fl;Zp3-cre-2	Clppfl/fl;Zp3-cre-3
349.655	333.389	339.02	317.75	200.765	300.859
354.659	355.285	317.124	297.731	318.375	326.508
382.185	374.678	336.517	167.609	317.124
AVG	349.168	280.84
SEM	6.42863	20.1915
