# Supplementary material for: Mitochondrial stress response gene Clpp deficiency impairs oocyte competence and deteriorate cyclophosphamide-induced ovarian damage in young mice
Source: Front Endocrinol (Lausanne). 2023 Mar 24;14:1122012. doi: 10.3389/fendo.2023.1122012 (PMC10081448; doi:10.3389/fendo.2023.1122012)
Supplement: Supplementary file 5 [file Table_4.xlsx]

## Sheet: Fig 4-C, D
	Fig 4-C Parthenogenetic activation rate (%)							Fig 4-D Blastocyst Rate after parthenogenetic activation(%)
	PBS		75μM CTX treat					PBS		75μM CTX treat
	Clppfl/fl	Clppfl/fl;zp3-cre	Clppfl/fl	Clppfl/fl;zp3-cre				Clppfl/fl	Clppfl/fl;zp3-cre	Clppfl/fl	Clppfl/fl;zp3-cre
	1	0.724138	0.894737	0.533333				0.92	0.235294	1	0
	1	0.757576	0.870968	0.481481				0.9375	0.4	1	0
	0.925926	0.769231	0.85	0.555556				0.818182	0.4	0.928571	0
	0.9		1	0.571429				0.909091		0.714286	0
			1	0.55						0.526316	0
AVG	0.956481	0.750315	0.923141	0.53836			AVG	0.896193	0.345098	0.833835	0
SEM	0.0222367	0.0110341	0.0287702	0.0138349			SEM	0.0230829	0.0448273	0.0832002	0

## Sheet: Fig 4-F
Fig 4-F
follicle count
		Primordial FC	Primary FC	Secondary FC	Antral FC	Corpora lutea	Atretic FC		*5		Primordial FC	Primary FC	Secondary FC	Antral FC	Corpora lutea	Atretic FC											AVG
cko-1	page-1	24	9	6	2	3	2			page-1	120	9	6	2	3	10				Primordial FC	Primary FC	Secondary FC	Antral FC	Corpora lutea	Atretic FC		Primordial FC	Primary FC	Secondary FC	Antral FC	Corpora lutea	Atretic FC
	page-2	16	11	6	1	2	5			page-2	80	11	6	1	2	25			cko-1	390	36	29	10	9	70	cko	405	34	27.3333	11.3333	11.3333	78.3333
	page-3	22	10	12	5	0	4			page-3	110	10	12	5	0	20			cko-2	380	33	24	9	10	75	WT	406.667	45.3333	38	22.3333	15.6667	55
	page-4	16	6	5	2	4	3			page-4	80	6	5	2	4	15			cko-3	445	33	29	15	15	90	cko+ctx	301.667	38.6667	30.3333	11.6667	9.33333	183.333
		78	36	29	10	9	14	176			390	36	29	10	9	70	544		WT-1	385	44	35	21	12	50	WT+ctx	381.667	54	44.3333	27.3333	19	71.6667
		44.3182	20.4545	16.4773	5.68182	5.11364	7.95455				71.6912	6.61765	5.33088	1.83824	1.65441	12.8676			WT-2	425	49	45	29	19	60
																			WT-3	410	43	34	17	16	55		SEM
																			cko+ctx-1	270	44	33	7	5	190	cko	16.4992	0.816497	1.36083	1.51535	1.51535	4.90653
																			cko+ctx-2	315	33	25	15	8	185	WT	9.52579	1.51535	2.86744	2.88033	1.65552	2.35702
cko-2	page-1	27	5	4	1	1	3			page-1	135	5	4	1	1	15			cko+ctx-3	320	39	33	13	15	175	cko+ctx	12.9815	2.59629	2.17732	1.96261	2.41906	3.60041
	page-2	13	14	3	4	3	4			page-2	65	14	3	4	3	20			WT+ctx-1	410	56	42	31	21	70	WT+ctx	31.652	2.0548	2.76218	2.99382	0.816497	1.36083
	page-3	28	1	9	3	1	6			page-3	140	1	9	3	1	30			WT+ctx-2	430	49	51	31	18	75
	page-4	8	4	8	1	5	2			page-4	40	4	8	1	5	10			WT+ctx-3	305	57	40	20	18	70
		76	33	24	9	10	15	167			380	33	24	9	10	75	531
		45.509	19.7605	14.3713	5.38922	5.98802	8.98204				71.5631	6.21469	4.51977	1.69492	1.88324	14.1243
																				WT-1	WT-2	WT-3	WT+ctx-1	WT+ctx-2	WT+ctx-3	cko-1	cko-2	cko-3	cko+ctx-1	cko+ctx-2	cko+ctx-3
cko-2	page-1	24	4	6	3	6	3			page-1	120	4	6	3	6	15			Primordial FC	385	425	410	410	430	305	390	380	445	270	315	320
	page-2	22	12	9	5	2	4			page-2	110	12	9	5	2	20			Primary FC	44	49	43	56	49	57	36	33	33	44	33	39
	page-3	25	8	11	4	4	6			page-3	125	8	11	4	4	30			Secondary FC	35	45	34	42	51	40	29	24	29	33	25	33
	page-4	18	9	3	3	3	5			page-4	90	9	3	3	3	25			Antral FC	21	29	17	31	31	20	10	9	15	7	15	13
		89	33	29	15	15	18	199			445	33	29	15	15	90	627		Corpora lutea	12	19	16	21	18	18	9	10	15	5	8	15
		44.7236	16.5829	14.5729	7.53769	7.53769	9.04523				70.9729	5.26316	4.6252	2.39234	2.39234	14.3541			Atretic FC	50	60	55	70	75	70	70	75	90	190	185	175
WT-1	page-1	22	15	12	7	10	3			page-1	110	15	12	7	10	15
	page-2	28	20	14	9	2	4			page-2	140	20	14	9	2	20
	page-3	27	9	9	5	0	3			page-3	135	9	9	5	0	15
		77	44	35	21	12	10	199			385	44	35	21	12	50	547
		38.6935	22.1106	17.5879	10.5528	6.03015	5.02513				70.3839	8.04388	6.39854	3.83912	2.19378	9.14077
WT-2	page-1	23	16	13	5	7	3			page-1	115	16	13	5	7	15
	page-2	25	15	12	11	1	3			page-2	125	15	12	11	1	15
	page-3	11	10	9	7	6	2			page-3	55	10	9	7	6	10
	page-4	26	8	11	6	5	4			page-4	130	8	11	6	5	20
		85	49	45	29	19	12	239			425	49	45	29	19	60	627
		35.5649	20.5021	18.8285	12.1339	7.94979	5.02092				67.7831	7.81499	7.17703	4.6252	3.0303	9.56938
WT-3	page-1	23	12	11	6	12	2			page-1	115	12	11	6	12	10
	page-2	29	21	12	4	2	5			page-2	145	21	12	4	2	25
	page-3	30	10	11	7	2	4			page-3	150	10	11	7	2	20
		82	43	34	17	16	11	203			410	43	34	17	16	55	575
		40.3941	21.1823	16.7488	8.37438	7.88177	5.41872				71.3043	21.1823	16.7488	8.37438	7.88177	9.56522
cko+ctx-1	page-1	20	10	9	2	1	5			page-1	100	10	9	2	1	25
	page-2	11	12	7	1	2	9			page-2	55	12	7	1	2	45
	page-3	13	12	9	2	1	16			page-3	65	12	9	2	1	80
	page-4	10	10	8	2	1	8			page-4	50	10	8	2	1	40
		54	44	33	7	5	38	181			270	44	33	7	5	190	549
		29.8343	24.3094	18.232	3.8674	2.76243	20.9945				49.1803	8.01457	6.01093	1.27505	0.910747	34.6084
cko+ctx-2	page-1	12	5	5	5	1	11			page-1	60	5	5	5	1	55
	page-2	14	7	6	3	3	7			page-2	70	7	6	3	3	35
	page-3	22	9	4	5	1	8			page-3	110	9	4	5	1	40
	page-4	15	12	10	2	3	11			page-4	75	12	10	2	3	55
		63	33	25	15	8	37	181			315	33	25	15	8	185	581
		34.8066	18.232	13.8122	8.28729	4.41989	20.442				54.2169	5.67986	4.30293	2.58176	1.37694	31.8417
cko+ctx-3	page-1	16	9	7	5	6	10			page-1	80	9	7	5	6	50
	page-2	19	12	11	3	2	4			page-2	95	12	11	3	2	20
	page-3	18	11	9	4	4	12			page-3	90	11	9	4	4	60
	page-4	11	7	6	1	3	9			page-4	55	7	6	1	3	45
		64	39	33	13	15	35	199			320	39	33	13	15	175	595
		32.1608	19.598	16.5829	6.53266	7.53769	17.5879				53.7815	6.55462	5.54622	2.18487	2.52101	29.4118
WT+ctx-1	page-1	22	12	10	8	6	4			page-1	110	12	10	8	6	20
	page-2	19	18	11	6	8	2			page-2	95	18	11	6	8	10
	page-3	18	15	12	7	2	5			page-3	90	15	12	7	2	25
		23	11	9	10	5	3				115	11	9	10	5	15
		82	56	42	31	21	14	246			410	56	42	31	21	70	630
		33.3333	22.7642	17.0732	12.6016	8.53659	5.69106				65.0794	8.88889	6.66667	12.6016	3.33333	11.1111
WT+ctx-2	page-1	23	16	13	9	7	5			page-1	115	16	13	9	7	25
	page-2	19	12	15	4	2	3			page-2	95	12	15	4	2	15
	page-3	18	10	12	11	6	5			page-3	90	10	12	11	6	25
	page-4	26	11	11	7	3	2			page-4	130	11	11	7	3	10
		86	49	51	31	18	15	250			430	49	51	31	18	75	654
		34.4	19.6	20.4	12.4	7.2	6				65.7492	7.49235	7.79817	4.74006	2.75229	11.4679
WT+ctx-3	page-1	22	15	17	5	6	5			page-1	110	15	17	5	6	25
	page-2	20	23	13	9	3	5			page-2	100	23	13	9	3	25
	page-3	19	19	10	6	9	4			page-3	95	19	10	6	9	20
		61	57	40	20	18	14	210			305	57	40	20	18	70	510
		29.0476	27.1429	19.0476	9.52381	8.57143	6.66667				59.8039	11.1765	7.84314	9.52381	3.52941	13.7255
