# Supplementary material for: Mitochondrial stress response gene Clpp deficiency impairs oocyte competence and deteriorate cyclophosphamide-induced ovarian damage in young mice
Source: Front Endocrinol (Lausanne). 2023 Mar 24;14:1122012. doi: 10.3389/fendo.2023.1122012 (PMC10081448; doi:10.3389/fendo.2023.1122012)
Supplement: Supplementary file 7 [file Table_6.xlsx]

## Sheet: Fig 1-Cii 
Fig 1-Cii Western blot to measure clpp knockout efficacy
		Area	Mean	IntDen	RawIntDen		clpp/actin	Normalized analysis					Statistical Analysis
Clpp	WT-1	0.72	150.73	108.08	38910395	WT-1	0.695809	0.698648	0.995936
	CKO-1	0.35	26.75	9.45	3403182	CKO-1	0.0825039		0.118091				Column B	Clpp;zp3-cre
	WT-2	0.76	108.49	82.28	29619749	WT-2	0.794362		1.137				vs.	vs.
	CKO-2	0.38	44.68	16.83	6059547	CKO-2	0.229949		0.329135				Column A	Clpp
	WT-3	0.98	103.39	101.14	36410995	WT-3	0.605774		0.867066
	CKO-3	0.6	50.61	30.55	10996750	CKO-3	0.18628		0.26663				Unpaired t test
Actin	WT-1	0.8	194.73	155.33	55919969								P value	0.0016
	CKO-1	0.79	145.44	114.54	41235621								P value summary	**
	WT-2	0.73	142	103.58	37289608								Significantly different (P < 0.05)?	Yes
	CKO-2	0.61	120.65	73.19	26349205								One- or two-tailed P value?	Two-tailed
	WT-3	0.9	186.22	166.96	60105414								t, df	t=7.623, df=4
	CKO-3	0.92	178.26	164	59038434
								WT	CKO				How big is the difference?
								0.995936	0.118091				Mean of column A	1
								1.137	0.329135				Mean of column B	0.238
								0.867066	0.26663				Difference between means (B - A) ± SEM	-0.7620 ± 0.09997
													95% confidence interval	-1.040 to -0.4845
								WT	CKO				R squared (eta squared)	0.9356
							AVG	1	0.237952
							SEM	0.0636454	0.0511028				F test to compare variances
													F, DFn, Dfd	1.551, 2, 2
													P value	0.784
													P value summary	ns
													Significantly different (P < 0.05)?	No
													Data analyzed
													Sample size, column A	3
													Sample size, column B	3

## Sheet: Fig 1-E 
Fig 1-E qPCR to measure clpp knockout efficacy
Sample Name	Target Name	Cт
WT-MII-1	actin	30.9393
WT-MII-1	actin	30.201												Statistical Analysis	Fig1-G
WT-MII-1	actin	30.0672
WT-MII-2	actin	30.232			WT-MII-1	WT-MII-2	WT-MII-3	CKO-MII-1	CKO-MII-2	CKO-MII-3				Column B	CKO-MII
WT-MII-2	actin	30.4775		actin	30.9393	30.232	30.9486	31.693	32.0828	32.6538				vs.	vs.
WT-MII-2	actin	30.3098		actin	30.201	30.4775	30.2166	32.6774	31.7565	31.653				Column A	WT-MII
WT-MII-3	actin	30.9486		actin	30.0672	30.3098	30.5058	31.6918	32.5848	31.8089
WT-MII-3	actin	30.2166		CLPP	33.8531	33.0368	34.1291	36.8153	37.1188	37.14				Paired t test
WT-MII-3	actin	30.5058		CLPP	33.3067	33.4433	33.8557	37.693	37.4941	36.9622				P value	0.0075
CKO-MII-1	actin	31.693		CLPP	33.2403	33.7161	33.6325	37.3582	36.9975	37.1128				P value summary	**
CKO-MII-1	actin	32.6774												Significantly different (P < 0.05)?	Yes
CKO-MII-1	actin	31.6918												One- or two-tailed P value?	Two-tailed
CKO-MII-2	actin	32.0828												t, df	t=11.45, df=2
CKO-MII-2	actin	31.7565			WT-MII-1	WT-MII-2	WT-MII-3	CKO-MII-1	CKO-MII-2	CKO-MII-3				Number of pairs	3
CKO-MII-2	actin	32.5848		gapdh	30.4025	30.3398	30.557	32.0207	32.1414	32.0385
CKO-MII-3	actin	32.6538												How big is the difference?
CKO-MII-3	actin	31.653												Mean of differences	-0.7458
CKO-MII-3	actin	31.8089												SD of differences	0.1128
WT-MII-1	clpp	33.8531		CLPP	33.4667	33.3987	33.8724	37.2888	37.2035	37.0717		WT-MII	CKO-MII	SEM of differences	0.06512
WT-MII-1	clpp	33.3067			3.06418	3.05898	3.31547	5.26811	5.06211	5.03312		1.05495	0.228972	95% confidence interval	-1.026 to -0.4656
WT-MII-1	clpp	33.2403			3.14621							1.05875	0.264114	R squared (partial eta squared)	0.985
WT-MII-2	clpp	33.0368			-0.0820329	-0.0872279	0.169261	2.12189	1.9159	1.88691		0.886304	0.269475
WT-MII-2	clpp	33.4433			1.05851	1.06233	0.889298	0.229745	0.265006	0.270386				How effective was the pairing?
WT-MII-2	clpp	33.7161			1.00338						AVG	1	0.254187	Correlation coefficient (r)	-0.5863
WT-MII-3	clpp	34.1291			1.05495	1.05875	0.886304	0.228972	0.264114	0.269475	SEM	0.0464247	0.0103714	P value (one tailed)	0.3006
WT-MII-3	clpp	33.8557												P value summary	ns
WT-MII-3	clpp	33.6325												Was the pairing significantly effective?	No
CKO-MII-1	clpp	36.8153												Sample size, column B	3
CKO-MII-1	clpp	37.693
CKO-MII-1	clpp	37.3582
CKO-MII-2	clpp	37.1188				WT-MII	CKO-MII
CKO-MII-2	clpp	37.4941				1.05495	0.228972
CKO-MII-2	clpp	36.9975				1.05875	0.264114
CKO-MII-3	clpp	37.14				0.886304	0.269475
CKO-MII-3	clpp	36.9622
CKO-MII-3	clpp	37.1128			AVG	1	0.254187
					SEM	0.0464247	0.0103714

## Sheet: Fig 1-F,G
Fig 1-F.G fertility testing																						Clppfl/fl		Clppfl/fl;ZP3-Cre
												birthday(day)		mating day	Clppfl/fl	Clppfl/fl;ZP3-Cre						(0331) 5pups	5	(0404)15pups	15
	cko-1	(0419) 6pups (0425)5pups (0519)6pups (0617)4pups (0725)7pups (0821)6pups (0911)6pups (1007) 4pups (1113)1pups									2.03333	61	2022-03-04	DAY 1	0	0	1	0	0			(0404) 7pups	7	(0405) 7pups	7
	cko-2	(0404)15pups (0423)8pups (0728)8pups (0917) 2pups(1117)3 pups									2.06667	62	2022-03-05	DAY 2	0	0	1	0	0			(0407) 7pups	7	(0407) 10pups	10
	cko-3	(0419) 1pups (0519)2pups (0619)2pups (0803)4pups (0925) 3pups (1022) 2 pups (1116)2pups									2.1	63	2022-03-06	DAY 3	0	0	1	0	0			(0410)9pups	9	(0419) 1pups	1
	cko-4	(0405) 7pups (0430)1pups dead (0612)7pups (0708)6pups (0820)2pups(0924)4pups(1020)3pups									2.13333	64	2022-03-07	DAY 4	0	0	1	0	0			(0413)8pups	8	(0419) 6pups	6
	cko-5	(0601)7pups (0626)2pups (0714)6pups (0809)3pups(0830)7pups (0930)2pups(1021)4pups									2.16667	65	2022-03-08	DAY 5	0	0	1	0	0			(0429) 3 pups	3	(0423)8pups	8
	cko-6	(0407) 10pups (0516)5pups (0613)4pups (0807)5pups(0902)8pups(0924)4pups									2.2	66	2022-03-09	DAY 6	0	0	1	0	0			(0507)10pups	10	(0425)5pups	5
											2.23333	67	2022-03-10	DAY 7	0	0	1	0	0			(0511)11pups	11	(0430)1pups	1
											2.26667	68	2022-03-11	DAY 8	0	0	1	0	0			(0512)9pups	9	(0516)5pups	5
	WT-1	(0507)10pups (0529)13pups (0620)7pups (0714)3pups (0826)11pups (1106)4pups									2.3	69	2022-03-12	DAY 9	0	0	1	0	0			(0513)7pups	7	(0519)2pups	2
	WT-2	(0410)9pups (0512)9pups(0717)9pups (0809)8pups(0916)9pups (1128)6pups									2.33333	70	2022-03-13	DAY 10	0	0	1	0	0			(0516)10pups s	10	(0519)6pups	6
	WT-3	(0331) 5pups (0511)11pups (0601)9pups (0622)10pups (0803)10pups (0826)8pups(0915)6pups(1122)4pups									2.36667	71	2022-03-14	DAY 11	0	0	1	0	0			(0529)13pups	13	(0601)7pups	7
	WT-4	(0407) 7pups (0429) 3 pups (0620)8pups(0729)8pups (0928)8pups(1102)7pups(1129)preg15d									2.4	72	2022-03-15	DAY 12	0	0	1	0	0			(0601)9pups	9	(0612)7pups	7
	WT-5	(0404) 7pups (0513)7pups (0610)11pups (0722)11pups(0826)6pups (0924)4pups(1015)4pups									2.43333	73	2022-03-16	DAY 13	0	0	1	0	0			(0610)11pups	11	(0613)4pups	4
	WT-6	(0413)8pups (0516)10pups (0701)8pups (0814)7pups (0915)7pups(1011)5pups(1101)4pups(1128)7pups									2.46667	74	2022-03-17	DAY 14	0	0	1	0	0			(0620)7pups	7	(0617)4pups	4
											2.5	75	2022-03-18	DAY 15	0	0	1	0	0			(0620)8pups	8	(0619)2pups	2
											2.53333	76	2022-03-19	DAY 16	0	0	1	0	0			(0622)10pups	10	(0626)2pups	2
											2.56667	77	2022-03-20	DAY 17	0	0	1	0	0			(0701)8pups	8	(0708)6pups	6
											2.6	78	2022-03-21	DAY 18	0	0	1	0	0			(0714)3pups	3	(0714)6pups	6
					Statistical Analysis	Fig1-I					2.63333	79	2022-03-22	DAY 19	0	0	1	0	0			(0717)9pups	9	(0725)7pups	7
	Fig 1-G No.of pups per litter(10 month)										2.66667	80	2022-03-23	DAY 20	0	0	1	0	0			(0722)11pups	11	(0728)8pups	8
		Clppfl/fl	Clppfl/fl;ZP3-Cre		Column B	Clppfl/fl;ZP3-Cre					2.7	81	2022-03-24	DAY 21	0	0	1	0	0			(0729)8pups	8	(0803)4pups	4
		4	3		vs.	vs.					2.73333	82	2022-03-25	DAY 22	0	0	1	0	0			(0803)10pups	10	(0807)5pups	5
		7	4		Column A	Clppfl/fl					2.76667	83	2022-03-26	DAY 23	0	0	1	0	0			(0809)8pups	8	(0809)3pups	3
		4	2								2.8	84	2022-03-27	DAY 24	0	0	1	0	0			(0814)7pups	7	(0820)2pups	2
		4	1		Unpaired t test						2.83333	85	2022-03-28	DAY 25	0	0	1	0	0			(0826)11pups	11	(0821)6pups	6
		6	2		P value	0.0036					2.86667	86	2022-03-29	DAY 26	0	0	1	0	0			(0826)6pups	6	(0830)7pups	7
		7	3		P value summary	**					2.9	87	2022-03-30	DAY 27	0	0	1	0.833333	0			(0826)8pups	8	(0902)8pups	8
					Significantly different (P < 0.05)?	Yes					2.93333	88	2022-03-31	DAY 28	0.833333	0	1	0	0			(0915)6pups	6	(0911)6pups	6
					One- or two-tailed P value?	Two-tailed					2.96667	89	2022-04-01	DAY 29	0.833333	0	1	0	0			(0915)7pups	7	(0917)2pups	2
	AVG	5.33333	2.5		t, df	t=3.782, df=10					3	90	2022-04-02	DAY 30	0.833333	0	1	0	0			(0916)9pups	9	(0924)4pups	4
	SEM	0.561084	0.390868								3.03333	91	2022-04-03	DAY 31	0.833333	0	1	1.16667	2.5			(0924)4pups	4	(0924)4pups	4
					How big is the difference?						3.06667	92	2022-04-04	DAY 32	2	2.5	1	0	1.16667			(0928)8pups	8	(0925) 3pups	3
					Mean of column A	5.333					3.1	93	2022-04-05	DAY 33	2	3.66667	1	0	0			(1011)5pups	5	(0930)2pups	2
					Mean of column B	2.5					3.13333	94	2022-04-06	DAY 34	2	3.66667	1	1.16667	1.66667			(1015)4pups	4	(1007) 4pups	4
					Difference between means (B - A) ± SEM	-2.833 ± 0.7491					3.16667	95	2022-04-07	DAY 35	3.16667	5.33333	1	0	0			(1101)4pups	4	(1020)3pups	3
					95% confidence interval	-4.502 to -1.164					3.2	96	2022-04-08	DAY 36	3.16667	5.33333	1	0	0			(1102)7pups	7	(1021)4pups	4
					R squared (eta squared)	0.5886					3.23333	97	2022-04-09	DAY 37	3.16667	5.33333	1	1.5	0			(1106)4pups	4	(1022) 2 pups	2
											3.26667	98	2022-04-10	DAY 38	4.66667	5.33333	1	0	0			(1122)4pups	4	(1113)1pups	1
					F test to compare variances						3.3	99	2022-04-11	DAY 39	4.66667	5.33333	1	0	0			(1128)6pups	6	(1116)2pups	2
					F, DFn, Dfd	2.061, 5, 5					3.33333	100	2022-04-12	DAY 40	4.66667	5.33333	1	1.33333	0			(1128)7pup	7	(1117)3 pups	3
					P value	0.4464					3.36667	101	2022-04-13	DAY 41	6	5.33333	1	0	0
					P value summary	ns					3.4	102	2022-04-14	DAY 42	6	5.33333	1	0	0
					Significantly different (P < 0.05)?	No					3.43333	103	2022-04-15	DAY 43	6	5.33333	1	0	0
											3.46667	104	2022-04-16	DAY 44	6	5.33333	1	0	0
					Data analyzed						3.5	105	2022-04-17	DAY 45	6	5.33333	1	0	0
					Sample size, column A	6					3.53333	106	2022-04-18	DAY 46	6	5.33333	1	0	1.16667
					Sample size, column B	6					3.56667	107	2022-04-19	DAY 47	6	6.5	1	0	0
											3.6	108	2022-04-20	DAY 48	6	6.5	1	0	0
											3.63333	109	2022-04-21	DAY 49	6	6.5	1	0	0
											3.66667	110	2022-04-22	DAY 50	6	6.5	1	0	1.33333
											3.7	111	2022-04-23	DAY 51	6	7.83333	1	0	0
											3.73333	112	2022-04-24	DAY 52	6	7.83333	1	0	0.833333
											3.76667	113	2022-04-25	DAY 53	6	8.66667	1	0	0
											3.8	114	2022-04-26	DAY 54	6	8.66667	1	0	0
											3.83333	115	2022-04-27	DAY 55	6	8.66667	1	0	0
											3.86667	116	2022-04-28	DAY 56	6	8.66667	1	0.5	0
											3.9	117	2022-04-29	DAY 57	6.5	8.66667	1	0	0.166667
											3.93333	118	2022-04-30	DAY 58	6.5	8.83333	1	0	0
											3.96667	119	2022-05-01	DAY 59	6.5	8.83333	1	0	0
											4	120	2022-05-02	DAY 60	6.5	8.83333	1	0	0
											4.03333	121	2022-05-03	DAY 61	6.5	8.83333	1	0	0
											4.06667	122	2022-05-04	DAY 62	6.5	8.83333	1	0	0
											4.1	123	2022-05-05	DAY 63	6.5	8.83333	1	0	0
											4.13333	124	2022-05-06	DAY 64	6.5	8.83333	1	1.66667	0
											4.16667	125	2022-05-07	DAY 65	8.16667	8.83333	1	0	0
											4.2	126	2022-05-08	DAY 66	8.16667	8.83333	1	0	0
											4.23333	127	2022-05-09	DAY 67	8.16667	8.83333	1	0	0
											4.26667	128	2022-05-10	DAY 68	8.16667	8.83333	1	1.83333	0
											4.3	129	2022-05-11	DAY 69	10	8.83333	1	1.5	0
											4.33333	130	2022-05-12	DAY 70	11.5	8.83333	1	1.16667	0
											4.36667	131	2022-05-13	DAY 71	12.6667	8.83333	1	0	0
											4.4	132	2022-05-14	DAY 72	12.6667	8.83333	1	1.66667	0
											4.43333	133	2022-05-15	DAY 73	14.3333	8.83333	1	0	0.833333
											4.46667	134	2022-05-16	DAY 74	14.3333	9.66667	1	0	0
											4.5	135	2022-05-17	DAY 75	14.3333	9.66667	1	0	0
											4.53333	136	2022-05-18	DAY 76	14.3333	9.66667	1	0	0.333333
											4.56667	137	2022-05-19	DAY 77	14.3333	10	1	0	1
											4.6	138	2022-05-20	DAY 78	14.3333	11	1	0	0
											4.63333	139	2022-05-21	DAY 79	14.3333	11	1	0	0
											4.66667	140	2022-05-22	DAY 80	14.3333	11	1	0	0
											4.7	141	2022-05-23	DAY 81	14.3333	11	1	0	0
											4.73333	142	2022-05-24	DAY 82	14.3333	11	1	0	0
											4.76667	143	2022-05-25	DAY 83	14.3333	11	1	0	0
											4.8	144	2022-05-26	DAY 84	14.3333	11	1	0	0
											4.83333	145	2022-05-27	DAY 85	14.3333	11	1	0	0
											4.86667	146	2022-05-28	DAY 86	14.3333	11	1	2.16667	0
											4.9	147	2022-05-29	DAY 87	16.5	11	1	0	0
											4.93333	148	2022-05-30	DAY 88	16.5	11	1	0	0
											4.96667	149	2022-05-31	DAY 89	16.5	11	1	1	1.16667
											5	150	2022-06-01	DAY 90	17.5	12.1667	1	0	0
											5.03333	151	2022-06-02	DAY 91	17.5	12.1667	1	0	0
											5.06667	152	2022-06-03	DAY 92	17.5	12.1667	1	0	0
											5.1	153	2022-06-04	DAY 93	17.5	12.1667	1	0	0
											5.13333	154	2022-06-05	DAY 94	17.5	12.1667	1	0	0
											5.16667	155	2022-06-06	DAY 95	17.5	12.1667	1	0	0
											5.2	156	2022-06-07	DAY 96	17.5	12.1667	1	0	0
											5.23333	157	2022-06-08	DAY 97	17.5	12.1667	1	0	0
											5.26667	158	2022-06-09	DAY 98	17.5	12.1667	1	1.83333	0
											5.3	159	2022-06-10	DAY 99	19.3333	12.1667	1	0	0
											5.33333	160	2022-06-11	DAY 100	19.3333	12.1667	1	0	1.16667
											5.36667	161	2022-06-12	DAY 101	19.3333	13.3333	1	0	0.666667
											5.4	162	2022-06-13	DAY 102	19.3333	14	1	0	0
											5.43333	163	2022-06-14	DAY 103	19.3333	14	1	0	0
											5.46667	164	2022-06-15	DAY 104	19.3333	14	1	0	0
											5.5	165	2022-06-16	DAY 105	19.3333	14	1	0	0.666667
											5.53333	166	2022-06-17	DAY 106	19.3333	14.6667	1	0	0
											5.56667	167	2022-06-18	DAY 107	19.3333	14.6667	1	0	0
											5.6	168	2022-06-19	DAY 108	19.3333	14.6667	1	2.5	0
											5.63333	169	2022-06-20	DAY 109	21.8333	14.6667	1	0	0
											5.66667	170	2022-06-21	DAY 110	21.8333	14.6667	1	1.66667	0
											5.7	171	2022-06-22	DAY 111	23.5	14.6667	1	0	0
											5.73333	172	2022-06-23	DAY 112	23.5	14.6667	1	0	0
											5.76667	173	2022-06-24	DAY 113	23.5	14.6667	1	0	0
											5.8	174	2022-06-25	DAY 114	23.5	14.6667	1	0	0.333333
											5.83333	175	2022-06-26	DAY 115	23.5	15	1	0	0
											5.86667	176	2022-06-27	DAY 116	23.5	15	1	0	0
											5.9	177	2022-06-28	DAY 117	23.5	15	1	0	0
											5.93333	178	2022-06-29	DAY 118	23.5	15	1	0	0
											5.96667	179	2022-06-30	DAY 119	23.5	15	1	1.33333	0
											6	180	2022-07-01	DAY 120	24.8333	15	1	0	0
											6.03333	181	2022-07-02	DAY 121	24.8333	15	1	0	0
											6.06667	182	2022-07-03	DAY 122	24.8333	15	1	0	0
											6.1	183	2022-07-04	DAY 123	24.8333	15	1	0	0
											6.13333	184	2022-07-05	DAY 124	24.8333	15	1	0	0
											6.16667	185	2022-07-06	DAY 125	24.8333	15	1	0	0
											6.2	186	2022-07-07	DAY 126	24.8333	15	1	0	1
											6.23333	187	2022-07-08	DAY 127	24.8333	16	1	0	0
											6.26667	188	2022-07-09	DAY 128	24.8333	16	1	0	0
											6.3	189	2022-07-10	DAY 129	24.8333	16	1	0	0
											6.33333	190	2022-07-11	DAY 130	24.8333	16	1	0	0
											6.36667	191	2022-07-12	DAY 131	24.8333	16	1	0	0
											6.4	192	2022-07-13	DAY 132	24.8333	16	1	0.5	1
											6.43333	193	2022-07-14	DAY 133	25.3333	17	1	0	0
											6.46667	194	2022-07-15	DAY 134	25.3333	17	1	0	0
											6.5	195	2022-07-16	DAY 135	25.3333	17	1	1.5	0
											6.53333	196	2022-07-17	DAY 136	26.8333	17	1	0	0
											6.56667	197	2022-07-18	DAY 137	26.8333	17	1	0	0
											6.6	198	2022-07-19	DAY 138	26.8333	17	1	0	0
											6.63333	199	2022-07-20	DAY 139	26.8333	17	1	0	0
											6.66667	200	2022-07-21	DAY 140	26.8333	17	1	1.83333	0
											6.7	201	2022-07-22	DAY 141	28.6667	17	1	0	0
											6.73333	202	2022-07-23	DAY 142	28.6667	17	1	0	0
											6.76667	203	2022-07-24	DAY 143	28.6667	17	1	0	1.16667
											6.8	204	2022-07-25	DAY 144	28.6667	18.1667	1	0	0
											6.83333	205	2022-07-26	DAY 145	28.6667	18.1667	1	0	0
											6.86667	206	2022-07-27	DAY 146	28.6667	18.1667	1	0	1.33333
											6.9	207	2022-07-28	DAY 147	28.6667	19.5	1	1.33333	0
											6.93333	208	2022-07-29	DAY 148	30	19.5	1	0	0
											6.96667	209	2022-07-30	DAY 149	30	19.5	1	0	0
											7	210	2022-07-31	DAY 150	30	19.5	1	0	0
											7.03333	211	2022-08-01	DAY 151	30	19.5	1	1.66667	0
											7.06667	212	2022-08-02	DAY 152	31.6667	19.5	1	0	0.666667
											7.1	213	2022-08-03	DAY 153	31.6667	20.1667	1	0	0
											7.13333	214	2022-08-04	DAY 154	31.6667	20.1667	1	0	0
											7.16667	215	2022-08-05	DAY 155	31.6667	20.1667	1	0	0
											7.2	216	2022-08-06	DAY 156	31.6667	20.1667	1	0	0.833333
											7.23333	217	2022-08-07	DAY 157	31.6667	21	1	0	0
											7.26667	218	2022-08-08	DAY 158	31.6667	21	1	1.33333	0.5
											7.3	219	2022-08-09	DAY 159	33	21.5	1	0	0
											7.33333	220	2022-08-10	DAY 160	33	21.5	1	0	0
											7.36667	221	2022-08-11	DAY 161	33	21.5	1	0	0
											7.4	222	2022-08-12	DAY 162	33	21.5	1	0	0
											7.43333	223	2022-08-13	DAY 163	33	21.5	1	1.16667	0
											7.46667	224	2022-08-14	DAY 164	34.1667	21.5	1	0	0
											7.5	225	2022-08-15	DAY 165	34.1667	21.5	1	0	0
											7.53333	226	2022-08-16	DAY 166	34.1667	21.5	1	0	0
											7.56667	227	2022-08-17	DAY 167	34.1667	21.5	1	0	0
											7.6	228	2022-08-18	DAY 168	34.1667	21.5	1	0	0
											7.63333	229	2022-08-19	DAY 169	34.1667	21.5	1	0	0.333333
											7.66667	230	2022-08-20	DAY 170	34.1667	21.8333	1	0	1
											7.7	231	2022-08-21	DAY 171	34.1667	22.8333	1	0	0
											7.73333	232	2022-08-22	DAY 172	34.1667	22.8333	1	0	0
											7.76667	233	2022-08-23	DAY 173	34.1667	22.8333	1	0	0
											7.8	234	2022-08-24	DAY 174	34.1667	22.8333	1	0	0
											7.83333	235	2022-08-25	DAY 175	34.1667	22.8333	1	1	0
											7.86667	236	2022-08-26	DAY 176	35.1667	22.8333	1	1.83333	0
											7.9	237	2022-08-27	DAY 177	37	22.8333	1	1.33333	0
											7.93333	238	2022-08-28	DAY 178	38.3333	22.8333	1	0	0
											7.96667	239	2022-08-29	DAY 179	38.3333	22.8333	1	0	1.16667
											8	240	2022-08-30	DAY 180	38.3333	24	1	0	0
											8.03333	241	2022-08-31	DAY 181	38.3333	24	1	0	0
											8.06667	242	2022-09-01	DAY 182	38.3333	24	1	0	1.33333
											8.1	243	2022-09-02	DAY 183	38.3333	25.3333	1	0	0
											8.13333	244	2022-09-03	DAY 184	38.3333	25.3333	1	0	0
											8.16667	245	2022-09-04	DAY 185	38.3333	25.3333	1	0	0
											8.2	246	2022-09-05	DAY 186	38.3333	25.3333	1	0	0
											8.23333	247	2022-09-06	DAY 187	38.3333	25.3333	1	0	0
											8.26667	248	2022-09-07	DAY 188	38.3333	25.3333	1	0	0
											8.3	249	2022-09-08	DAY 189	38.3333	25.3333	1	0	0
											8.33333	250	2022-09-09	DAY 190	38.3333	25.3333	1	0	0
											8.36667	251	2022-09-10	DAY 191	38.3333	25.3333	1	0	1
											8.4	252	2022-09-11	DAY 192	38.3333	26.3333	1	0	0
											8.43333	253	2022-09-12	DAY 193	38.3333	26.3333	1	0	0
											8.46667	254	2022-09-13	DAY 194	38.3333	26.3333	1	1	0
											8.5	255	2022-09-14	DAY 195	39.3333	26.3333	1	1.16667	0
											8.53333	256	2022-09-15	DAY 196	40.5	26.3333	1	1.5	0
											8.56667	257	2022-09-16	DAY 197	42	26.3333	1	0	0.333333
											8.6	258	2022-09-17	DAY 198	42	26.6667	1	0	0
											8.63333	259	2022-09-18	DAY 199	42	26.6667	1	0	0
											8.66667	260	2022-09-19	DAY 200	42	26.6667	1	0	0
											8.7	261	2022-09-20	DAY 201	42	26.6667	1	0	0
											8.73333	262	2022-09-21	DAY 202	42	26.6667	1	0	0
											8.76667	263	2022-09-22	DAY 203	42	26.6667	1	0	0
											8.8	264	2022-09-23	DAY 204	42	26.6667	1	0.666667	0.666667
											8.83333	265	2022-09-24	DAY 205	42.6667	27.3333	1	0	0.666667
											8.86667	266	2022-09-25	DAY 206	42.6667	28	1	0	0.5
											8.9	267	2022-09-26	DAY 207	42.6667	28.5	1	0	0
											8.93333	268	2022-09-27	DAY 208	42.6667	28.5	1	1.33333	0
											8.96667	269	2022-09-28	DAY 209	44	28.5	1	0	0
											9	270	2022-09-29	DAY 210	44	28.5	1	0	0.333333
											9.03333	271	2022-09-30	DAY 211	44	28.8333	1	0	0
											9.06667	272	2022-10-01	DAY 212	44	28.8333	1	0	0
											9.1	273	2022-10-02	DAY 213	44	28.8333	1	0	0
											9.13333	274	2022-10-03	DAY 214	44	28.8333	1	0	0
											9.16667	275	2022-10-04	DAY 215	44	28.8333	1	0	0
											9.2	276	2022-10-05	DAY 216	44	28.8333	1	0	0
											9.23333	277	2022-10-06	DAY 217	44	28.8333	1	0	0.666667
											9.26667	278	2022-10-07	DAY 218	44	29.5	1	0	0
											9.3	279	2022-10-08	DAY 219	44	29.5	1	0	0
											9.33333	280	2022-10-09	DAY 220	44	29.5	1	0	0
											9.36667	281	2022-10-10	DAY 221	44	29.5	1	0.833333	0
											9.4	282	2022-10-11	DAY 222	44.8333	29.5	1	0	0
											9.43333	283	2022-10-12	DAY 223	44.8333	29.5	1	0	0
											9.46667	284	2022-10-13	DAY 224	44.8333	29.5	1	0	0
											9.5	285	2022-10-14	DAY 225	44.8333	29.5	1	0.666667	0
											9.53333	286	2022-10-15	DAY 226	45.5	29.5	1	0	0
											9.56667	287	2022-10-16	DAY 227	45.5	29.5	1	0	0
											9.6	288	2022-10-17	DAY 228	45.5	29.5	1	0	0
											9.63333	289	2022-10-18	DAY 229	45.5	29.5	1	0	0
											9.66667	290	2022-10-19	DAY 230	45.5	29.5	1	0	0.5
											9.7	291	2022-10-20	DAY 231	45.5	30	1	0	0.666667
											9.73333	292	2022-10-21	DAY 232	45.5	30.6667	1	0	0.333333
											9.76667	293	2022-10-22	DAY 233	45.5	31	1	0	0
											9.8	294	2022-10-23	DAY 234	45.5	31	1	0	0
											9.83333	295	2022-10-24	DAY 235	45.5	31	1	0	0
											9.86667	296	2022-10-25	DAY 236	45.5	31	1	0	0
											9.9	297	2022-10-26	DAY 237	45.5	31	1	0	0
											9.93333	298	2022-10-27	DAY 238	45.5	31	1	0	0
											9.96667	299	2022-10-28	DAY 239	45.5	31	1	0	0
											10	300	2022-10-29	DAY 240	45.5	31	1	0	0
											10.0333	301	2022-10-30	DAY 241	45.5	31	1	0	0
											10.0667	302	2022-10-31	DAY 242	45.5	31	1	1.83333	0
											10.1	303	2022-11-01	DAY 243	47.3333	31	1	0	0
											10.1333	304	2022-11-02	DAY 244	47.3333	31	1	0	0
											10.1667	305	2022-11-03	DAY 245	47.3333	31	1	0	0
											10.2	306	2022-11-04	DAY 246	47.3333	31	1	0	0
											10.2333	307	2022-11-05	DAY 247	47.3333	31	1	0.666667	0
											10.2667	308	2022-11-06	DAY 248	48	31	1	0	0
											10.3	309	2022-11-07	DAY 249	48	31	1	0	0
											10.3333	310	2022-11-08	DAY 250	48	31	1	0	0
											10.3667	311	2022-11-09	DAY 251	48	31	1	0	0
											10.4	312	2022-11-10	DAY 252	48	31	1	0	0
											10.4333	313	2022-11-11	DAY 253	48	31	1	0	0
											10.4667	314	2022-11-12	DAY 254	48	31	1	0	0.166667
											10.5	315	2022-11-13	DAY 255	48	31.1667	1	0	0
											10.5333	316	2022-11-14	DAY 256	48	31.1667	1	0	0
											10.5667	317	2022-11-15	DAY 257	48	31.1667	1	0	0.333333
											10.6	318	2022-11-16	DAY 258	48	31.5	1	0	0.5
											10.6333	319	2022-11-17	DAY 259	48	32	1	0	0
											10.6667	320	2022-11-18	DAY 260	48	32	1	0	0
											10.7	321	2022-11-19	DAY 261	48	32	1	0	0
											10.7333	322	2022-11-20	DAY 262	48	32	1	0	1
											10.7667	323	2022-11-21	DAY 263	48	33	1	0.666667	0
											10.8	324	2022-11-22	DAY 264	48.6667	33	1	0	0
											10.8333	325	2022-11-23	DAY 265	48.6667	33	1	0	0
											10.8667	326	2022-11-24	DAY 266	48.6667	33	1	0	0
											10.9	327	2022-11-25	DAY 267	48.6667	33	1	0	0
											10.9333	328	2022-11-26	DAY 268	48.6667	33	1	1	0
											10.9667	329	2022-11-27	DAY 269	49.6667	33	1	1.16667	0
											11	330	2022-11-28	DAY 270	50.8333	33	2

## Sheet: Fig 2 B 
		Primordial FC	Primary FC	Secondary FC	Antral FC	Corpora lutea	Atretic FC		*5		Primordial FC	Primary FC	Secondary FC	Antral FC	Corpora lutea	Atretic FC										Statistical Analysis
cko-1	page-1	24	9	6	2	3	2			page-1	120	9	6	2	3	10			Fig 2-B								Fig 2-B -Primordial FC
	page-2	16	11	6	1	2	5			page-2	80	11	6	1	2	25			Follicle count
	page-3	22	10	12	5	0	4			page-3	110	10	12	5	0	20											Column B	cko-1
	page-4	16	6	5	2	4	3			page-4	80	6	5	2	4	15											vs.	vs.
		78	36	29	10	9	14	176			390	36	29	10	9	70	544										Column A	WT-1
		44.3182	20.4545	16.4773	5.68182	5.11364	7.95455				71.6912	6.61765	5.33088	1.83824	1.65441	12.8676
																				Primordial FC	Primary FC	Secondary FC	Antral FC	Corpora lutea	Atretic FC		Unpaired t test
																			cko-1	390	36	29	10	9	70		P value	0.9465
																			cko-2	380	33	24	9	10	75		P value summary	ns
cko-2	page-1	27	5	4	1	1	3			page-1	135	5	4	1	1	15			cko-3	445	33	29	15	15	90		Significantly different (P < 0.05)?	No
	page-2	13	14	3	4	3	4			page-2	65	14	3	4	3	20											One- or two-tailed P value?	Two-tailed
	page-3	28	1	9	3	1	6			page-3	140	1	9	3	1	30											t, df	t=0.07143, df=4
	page-4	8	4	8	1	5	2			page-4	40	4	8	1	5	10			WT-1	385	44	35	21	12	50
		76	33	24	9	10	15	167			380	33	24	9	10	75	531		WT-2	425	49	45	29	19	60		How big is the difference?
		45.509	19.7605	14.3713	5.38922	5.98802	8.98204				71.5631	6.21469	4.51977	1.69492	1.88324	14.1243			WT-3	410	43	34	17	16	55		Mean of column A	406.7
																											Mean of column B	405
																											Difference between means (B - A) ± SEM	-1.667 ± 23.33
																				WT-1	WT-2	WT-3	cko-1	cko-2	cko-3		95% confidence interval	-66.45 to 63.12
cko-2	page-1	24	4	6	3	6	3			page-1	120	4	6	3	6	15			Primordial FC	385	425	410	390	380	445		R squared (eta squared)	0.001274	ns
	page-2	22	12	9	5	2	4			page-2	110	12	9	5	2	20			Primary FC	44	49	43	36	33	33				*
	page-3	25	8	11	4	4	6			page-3	125	8	11	4	4	30			Secondary FC	35	45	34	29	24	29		F test to compare variances		ns
	page-4	18	9	3	3	3	5			page-4	90	9	3	3	3	25			Antral FC	21	29	17	10	9	15		F, DFn, Dfd	3.000, 2, 2	ns
		89	33	29	15	15	18	199			445	33	29	15	15	90	627		Corpora lutea	12	19	16	9	10	15		P value	0.5	ns
		44.7236	16.5829	14.5729	7.53769	7.53769	9.04523				70.9729	5.26316	4.6252	2.39234	2.39234	14.3541			Atretic FC	50	60	55	70	75	90		P value summary	ns	*
																											Significantly different (P < 0.05)?	No
																								*p< 0.05; **p< 0.01; ***p< 0.001.
																											Data analyzed
WT-1	page-1	22	15	12	7	10	3			page-1	110	15	12	7	10	15											Sample size, column A	3
	page-2	28	20	14	9	2	4			page-2	140	20	14	9	2	20											Sample size, column B	3
	page-3	27	9	9	5	0	3			page-3	135	9	9	5	0	15
		77	44	35	21	12	10	199			385	44	35	21	12	50	547										Fig 2-B -Primary FC
		38.6935	22.1106	17.5879	10.5528	6.03015	5.02513				70.3839	22.1106	17.5879	10.5528	6.03015	9.14077
																											Column B	Data Set-B
																											vs.	vs.
																											Column A	Data Set-A
WT-2	page-1	23	16	13	5	7	3			page-1	115	16	13	5	7	15
	page-2	25	15	12	11	1	3			page-2	125	15	12	11	1	15											Paired t test
	page-3	11	10	9	7	6	2			page-3	55	10	9	7	6	10											P value	0.0422
	page-4	26	8	11	6	5	4			page-4	130	8	11	6	5	20											P value summary	*
		85	49	45	29	19	12	239			425	49	45	29	19	60	627										Significantly different (P < 0.05)?	Yes
		35.5649	20.5021	18.8285	12.1339	7.94979	5.02092				67.7831	7.81499	7.17703	4.6252	3.0303	9.56938											One- or two-tailed P value?	Two-tailed
																											t, df	t=4.715, df=2
																											Number of pairs	3
WT-3	page-1	23	12	11	6	12	2			page-1	115	12	11	6	12	10
	page-2	29	21	12	4	2	5			page-2	145	21	12	4	2	25											How big is the difference?
	page-3	30	10	11	7	2	4			page-3	150	10	11	7	2	20											Mean of differences	-11.33
		82	43	34	17	16	11	203			410	43	34	17	16	55	575										SD of differences	4.163
		40.3941	21.1823	16.7488	8.37438	7.88177	5.41872				71.3043	21.1823	16.7488	8.37438	7.88177	9.56522											SEM of differences	2.404
																											95% confidence interval	-21.68 to -0.9910
																											R squared (partial eta squared)	0.9175
																											How effective was the pairing?
																											Correlation coefficient (r)	-0.3592
																											P value (one tailed)	0.383
																											P value summary	ns
																											Was the pairing significantly effective?	No
																											Fig 2-B -Secondary FC
																											Column B	Data Set-B
																											vs.	vs.
																											Column A	Data Set-A
																											Paired t test
																											P value	0.1754
																											P value summary	ns
																											Significantly different (P < 0.05)?	No
																											One- or two-tailed P value?	Two-tailed
																											t, df	t=2.061, df=2
																											Number of pairs	3
																											How big is the difference?
																											Mean of differences	-10.67
																											SD of differences	8.963
																											SEM of differences	5.175
																											95% confidence interval	-32.93 to 11.60
																											R squared (partial eta squared)	0.6799
																											How effective was the pairing?
																											Correlation coefficient (r)	-0.9966
																											P value (one tailed)	0.0262
																											P value summary	*
																											Was the pairing significantly effective?	Yes
																											Fig 2-B -Antral
																											Column B	Data Set-B
																											vs.	vs.
																											Column A	Data Set-A
																											Paired t test
																											P value	0.1685
																											P value summary	ns
																											Significantly different (P < 0.05)?	No
																											One- or two-tailed P value?	Two-tailed
																											t, df	t=2.117, df=2
																											Number of pairs	3
																											How big is the difference?
																											Mean of differences	-11
																											SD of differences	9
																											SEM of differences	5.196
																											95% confidence interval	-33.36 to 11.36
																											R squared (partial eta squared)	0.6914
																											How effective was the pairing?
																											Correlation coefficient (r)	-0.8486
																											P value (one tailed)	0.1775
																											P value summary	ns
																											Was the pairing significantly effective?	No
																											Fig 2-B -Corpora lutea
																											Column B	Data Set-B
																											vs.	vs.
																											Column A	Data Set-A
																											Paired t test
																											P value	0.2132
																											P value summary	ns
																											Significantly different (P < 0.05)?	No
																											One- or two-tailed P value?	Two-tailed
																											t, df	t=1.803, df=2
																											Number of pairs	3
																											How big is the difference?
																											Mean of differences	-4.333
																											SD of differences	4.163
																											SEM of differences	2.404
																											95% confidence interval	-14.68 to 6.009
																											R squared (partial eta squared)	0.619
																											How effective was the pairing?
																											Correlation coefficient (r)	0.2362
																											P value (one tailed)	0.4241
																											P value summary	ns
																											Was the pairing significantly effective?	No
																											Fig 2-B -Atretic FC	Fig 2-B -Atretic
																											Column B	Data Set-B
																											vs.	vs.
																											Column A	Data Set-A
																											Unpaired t test
																											P value	0.0249
																											P value summary	*
																											Significantly different (P < 0.05)?	Yes
																											One- or two-tailed P value?	Two-tailed
																											t, df	t=3.500, df=4
																											How big is the difference?
																											Mean of column A	55
																											Mean of column B	78.33
																											Difference between means (B - A) ± SEM	23.33 ± 6.667
																											95% confidence interval	4.824 to 41.84
																											R squared (eta squared)	0.7538
																											F test to compare variances
																											F, DFn, Dfd	4.333, 2, 2
																											P value	0.375
																											P value summary	ns
																											Significantly different (P < 0.05)?	No
																											Data analyzed
																											Sample size, column A	3
																											Sample size, column B	3

## Sheet: Fig 2 C,D,E
Fig 2-C			Fig 2-D			Fig 2-E
MII oocyte number			2-cell-oocyte number			BL number
Clppfl/fl	Clppfl/fl;Zp3-cre		Clppfl/fl	Clppfl/fl;Zp3-cre		Clppfl/fl	Clppfl/fl;Zp3-cre
25	9		6	16		6	9
15	6		11	17		10	15
20	6		16	16		16	14
21	16					9	8
15	6					7	7
25	17					6	10
21	10						12
25	14
37	21
24	36
	27
	29
	33
	13
	27
Statistical Analysis
Fig 2-C			Fig 2-D			Fig 2-E
Column B	Clppfl/fl;Zp3-cre		Column B	Clppfl/fl;Zp3-cre		Column B	Clppfl/fl;Zp3-cre
vs.	vs.		vs.	vs.		vs.	vs.
Column A	Clppfl/fl		Column A	Clppfl/fl		Column A	Clppfl/fl
Unpaired t test			Unpaired t test			Unpaired t test
P value	0.199		P value	0.1404		P value	0.3847
P value summary	ns		P value summary	ns		P value summary	ns
Significantly different (P < 0.05)?	No		Significantly different (P < 0.05)?	No		Significantly different (P < 0.05)?	No
One- or two-tailed P value?	Two-tailed		One- or two-tailed P value?	Two-tailed		One- or two-tailed P value?	Two-tailed
t, df	t=1.323, df=23		t, df	t=1.835, df=4		t, df	t=0.9053, df=11
How big is the difference?			How big is the difference?			How big is the difference?
Mean of column A	22.8		Mean of column A	11		Mean of column A	9
Mean of column B	18		Mean of column B	16.33		Mean of column B	10.71
Difference between means (B - A) ± SEM	-4.800 ± 3.629		Difference between means (B - A) ± SEM	5.333 ± 2.906		Difference between means (B - A) ± SEM	1.714 ± 1.894
95% confidence interval	-12.31 to 2.708		95% confidence interval	-2.735 to 13.40		95% confidence interval	-2.453 to 5.882
R squared (eta squared)	0.07068		R squared (eta squared)	0.4571		R squared (eta squared)	0.06934
F test to compare variances			F test to compare variances			F test to compare variances
F, DFn, Dfd	2.662, 14, 9		F, DFn, Dfd	75.00, 2, 2		F, DFn, Dfd	1.559, 5, 6
P value	0.1437		P value	0.0263		P value	0.6008
P value summary	ns		P value summary	*		P value summary	ns
Significantly different (P < 0.05)?	No		Significantly different (P < 0.05)?	Yes		Significantly different (P < 0.05)?	No
Data analyzed			Data analyzed			Data analyzed
Sample size, column A	10		Sample size, column A	3		Sample size, column A	6
Sample size, column B	15		Sample size, column B	3		Sample size, column B	7

## Sheet: Fig 2 G
		good Good means that the oocyte spindle is in normal shape, while bed means abnormal spindle shape.
	Clppfl/fl-1	Clppfl/fl-2	Clppfl/fl-3	Clppfl/fl-4	Clppfl/fl-5	Clppfl/fl;Zp3-cre-1	Clppfl/fl;Zp3-cre-2	Clppfl/fl;Zp3-cre-3	Clppfl/fl;Zp3-cre-4	Clppfl/fl;Zp3-cre-5		Fig 2-G
												Abnormal spindle rate (%)
(bed/good)*100	4.54545	8.33333	10.3448	12	11.5385	22.2222	60	100	75	66.6667		Clppfl/fl	Clppfl/fl;Zp3-cre
bed/good	0.0454545	0.0833333	0.103448	0.12	0.115385	0.222222	0.6	1	0.75	0.666667		4.54545	22.2222
												8.33333	60
	good	good	good	good	good	bed	bed	bed	bed	bed		10.3448	100
	bed	good	good	good	good	good	bed	bed	good	bed		12	75
	good	good	good	good	good	good	bed	bed	bed	bed		11.5385	66.6667
	good	good	bed	bed	bed	good	good	bed	bed	good
	good	bed	good	good	good	bed	good	bed	bed	bed
	good	good	good	good	good	good	good	bed	good	good
	good	good	good	good	good	good	bed	bed	bed	good
	good	good	good	good	good	good	bed	bed	bed	bed
	good	good	good	good	good	good	bed	bed	good	bed		Statistical Analysis	Fig 2-G
	good	good	good	good	good	good	good	bed	bed	good
	good	good	good	good	good	bed	good	bed	bed	bed		Column A	Clppfl/fl
	good	good	good	good	good	good	bed	bed	good	bed		vs.	vs.
	good		good	good	good	good	bed		bed	bed		Column B	Clppfl/fl;Zp3-cre
	good		bed	bed	bed	good	bed		bed	bed
	good		good	good	good	good	good		bed	good		Unpaired t test
	good		good	good	good	good			bed	bed		P value	0.0011927
	good		good	good	good	bed				bed		P value summary	*
	good		bed	bed	bed	good				good		Significantly different (P < 0.05)?	Yes
	good		good	good	good							One- or two-tailed P value?	One-tailed
	good		good	good	good							t, df	t=4.368, df=8
	good		good	good	good
	good		good	good	good							How big is the difference?
			good	good	good							Mean of column A	9.352
			good	good	good							Mean of column B	64.78
			good	good	good							Difference between means (A - B) ± SEM	-55.43 ± 12.69
			good		good							95% confidence interval	-84.68 to -26.17
			good									R squared (eta squared)	0.7046
			good
			good									F test to compare variances
												F, DFn, Dfd	86.30, 4, 4
												P value	0.0007813
												P value summary	***
												Significantly different (P < 0.05)?	Yes
												Data analyzed
												Sample size, column A	5
												Sample size, column B	5

## Sheet: Fig 2 I
Chromosome number = 20 is the normal number of chromosomes, and the others are abnormal numbers, which are recorded as aneuploid oocytes
Clppfl/fl-1	Clppfl/fl-2	Clppfl/fl-3	Clppfl/fl;Zp3-cre-1	Clppfl/fl;Zp3-cre-2	Clppfl/fl;Zp3-cre-3
0.266667	0.3125	0.294118	0.583333	0.666667	0.588235		Fig 2-I
							Aneuploidy rate （%）
18	19	18	20	17	19		Clppfl/fl	Clppfl/fl;Zp3-cre
20	20	20	17	15	20		0.266667	0.583333
20	19	20	19	20	14		0.3125	0.666667
20	16	20	20	20	17		0.294118	0.588235
20	18	20	20	17	20
20	20	19	15	20	20
20	20	20	14	20	19		Statistical Analysis	Fig 2-I
20	20	20	18	19	18
19	20	20	20	18	15		Column B	Clppfl/fl;Zp3-cre
18	20	20	18	19	19		vs.	vs.
19	18	20	19	17	17		Column A	Clppfl/fl
20	20	20	20	19	20
20	20	18		20	20		Unpaired t test
20	20	20		14	17		P value	0.0005
20	20	19		20	18		P value summary	***
	20	18			20		Significantly different (P < 0.05)?	Yes
		20			20		One- or two-tailed P value?	Two-tailed
							t, df	t=10.56, df=4
							How big is the difference?
							Mean of column A	0.2922
							Mean of column B	0.6116
							Difference between means (B - A) ± SEM	0.3194 ± 0.03024
							95% confidence interval	0.2355 to 0.4034
							R squared (eta squared)	0.9654
							F test to compare variances
							F, DFn, Dfd	5.037, 2, 2
							P value	0.3313
							P value summary	ns
							Significantly different (P < 0.05)?	No
							Data analyzed
							Sample size, column A	3
							Sample size, column B	3

## Sheet: Fig 3 D
Fig 3-D
JC-1 Red/Green Fluorescent intensity distribution Rate
Clppfl/fl-1	Clppfl/fl-2	Clppfl/fl-3	Clppfl/fl;Zp3-cre-1	Clppfl/fl;Zp3-cre-2	Clppfl/fl;Zp3-cre-3
1.60178	2.64743	2.12719	0.68649	1.29055	1.30782
2.40659	2.66364	2.28511	0.205536	1.01342	0.574096
2.77068	2.50148	1.94677	1.00676	0.307332	1.34908		AVG	2.33414	0.951315
2.77207	2.13141	2.26388	1.62728	0.638335	1.08543		SEM	0.0574422	0.0897715
2.48948	2.1476	2.42175	2.00184	1.06333	0.992068
2.72576	2.44069	2.34814	0.522819	1.73263	1.43666
2.30121	2.44182	2.2422	0.844839	1.11543	0.426244
2.37544	1.96909		1.0958	0.497677	0.649079
1.99806			1.0196		0.244046
								Statistical Analysis	Fig 3-D
								Column B	Clppfl/fl;Zp3-cre
								vs.	vs.
								Column A	Clppfl/fl
								Unpaired t test
								P value	<0.0001
								P value summary	***
								Significantly different (P < 0.05)?	Yes
								One- or two-tailed P value?	Two-tailed
								t, df	t=12.49, df=48
								How big is the difference?
								Mean of column A	2.334
								Mean of column B	0.9513
								Difference between means (B - A) ± SEM	-1.383 ± 0.1108
								95% confidence interval	-1.606 to -1.160
								R squared (eta squared)	0.7646
								F test to compare variances
								F, DFn, Dfd	2.637, 25, 23
								P value	0.0223
								P value summary	*
								Significantly different (P < 0.05)?	Yes
								Data analyzed
								Sample size, column A	24
								Sample size, column B	26

## Sheet: Fig 3 E
Fig 3-E
Ros level
Clppfl/fl-1	Clppfl/fl-2	Clppfl/fl-3	Clppfl/fl;Zp3-cre-1	Clppfl/fl;Zp3-cre-2	Clppfl/fl;Zp3-cre-3
0.89	0.75	1.26	1.11	1.33	1.02
0.7	0.71	1.23	1.12	0.96	1.51
0.84	0.91	0.87	1.35	1.35	0.99
0.62	1.26	1.14	0.78	1.39	1.17		AVG	0.732308	1.16769
0.63	0.71	0.51	1.38	1.15	1.55		SEM	0.0632042	0.0445268
0.93	0.82	0.89	1.17	0.75	1.19
0.06	0.95	0.75	1.07	1.02	1.1
0.43		0.21	0.82	0.93	1.43			Statistical Analysis	Fig 3-E
		0.61	1.59	1.13
		0.12						Column B	Clppfl/fl;Zp3-cre
		0.24						vs.	vs.
								Column A	Clppfl/fl
								Unpaired t test
								P value	<0.0001
								P value summary	***
								Significantly different (P < 0.05)?	Yes
								One- or two-tailed P value?	Two-tailed
								t, df	t=5.522, df=50
								How big is the difference?
								Mean of column A	0.7323
								Mean of column B	1.168
								Difference between means (B - A) ± SEM	0.4354 ± 0.07884
								95% confidence interval	0.2770 to 0.5937
								R squared (eta squared)	0.3788
								F test to compare variances
								F, DFn, Dfd	2.015, 25, 25
								P value	0.086
								P value summary	ns
								Significantly different (P < 0.05)?	No
								Data analyzed
								Sample size, column A	26
								Sample size, column B	26

## Sheet: Fig 3 F
Fig 3-F
Abnormal mitochondrail distribution Rate
Clppfl/fl-1	Clppfl/fl-2	Clppfl/fl-3	Clppfl/fl;Zp3-cre-1	Clppfl/fl;Zp3-cre-2	Clppfl/fl;Zp3-cre-3
0.166667	0.181818	0.25	0.45	0.444444	0.555556
								Fig 3-F
1	1	1	1	1	1			Abnormal mitochondrail distribution Rate
1	1	1	0	0	0
1	1	0	1	1	0			Clppfl/fl	Clppfl/fl;Zp3-cre
1	1	1	0	0	0			0.166667	0.45
1	1	0	1	1	1			0.181818	0.444444
1	0	1	0	0	0			0.25	0.555556
1	1	1	1	0	0
0	1	1	0	1	0
1	1	1	1	0	1
1	0	0	0	1	0
1	1	1	1	1	1		AVG	0.199495	0.483333
1	1	1	0	0	1		SEM	0.0209256	0.0295137
0	1	0	1	1	0
1	1	1	0	0	1
1	0	0	1	1	1			Statistical Analysis	Fig 3-F
1	1	1	0	0	0
1	1	1	1	1	1			Column B	Clppfl/fl;Zp3-cre
0	0	1	0	1	0			vs.	vs.
	1	1	1					Column A	Clppfl/fl
	1	1	1
	1							Unpaired t test
								P value	0.0035
								P value summary	**
								Significantly different (P < 0.05)?	Yes
								One- or two-tailed P value?	Two-tailed
								t, df	t=6.167, df=4
								How big is the difference?
								Mean of column A	0.2
								Mean of column B	0.4833
								Difference between means (B - A) ± SEM	0.2833 ± 0.04595
								95% confidence interval	0.1558 to 0.4109
								R squared (eta squared)	0.9048
								F test to compare variances
								F, DFn, Dfd	2.333, 2, 2
								P value	0.6
								P value summary	ns
								Significantly different (P < 0.05)?	No
								Data analyzed
								Sample size, column A	3
								Sample size, column B	3

[truncated: 10 more sheets: Fig 3 G, Fig 3 H, Fig 3 I, Fig 4-C, D, Fig 4-F, Fig 5-C,D, Fig 5-E,F, Fig 5-I, Fig 5-J, Fig 5-K]
